## 20 Abstract

21 **Background:** Leptospirosis, caused by *Leptospira* bacteria, is a common zoonosis worldwide  
22 more prevalent in the tropics. Reservoir species and risk factors have been identified but  
23 surveys for environmental sources of leptospirosis are rare. Furthermore, understanding of  
24 environmental *Leptospira* containing pathogenic genes and possibly capable of causing disease  
25 is incomplete and could result in some pathogenic strains evading detection, thereby  
26 convoluting diagnosis, prevention, and epidemiology.

27 **Methodology/Principal Findings:** We collected environmental samples from 22 sites in Puerto  
28 Rico during three sampling periods over 14-months (Dec 2018-Feb 2020); 10 water and 10 soil  
29 samples were collected at each site. Samples were screened for pathogenic *Leptospira* DNA  
30 using the *lipL32* PCR assay and positive samples were sequenced to assess genetic diversity.  
31 One urban site in San Juan was sampled three times over 14 months to assess persistence in  
32 soil; live leptospire were obtained during the last sampling period. Isolates were whole  
33 genome sequenced and LipL32 expression was assessed *in vitro*.

34 We detected pathogenic *Leptospira* DNA at 15/22 sites; both soil and water were positive at  
35 5/15 sites. We recovered *lipL32* sequences from 83/86 positive samples (15/15 positive sites)  
36 and *secY* sequences from 32/86 (10/15 sites); multiple genotypes were identified at 12 sites.  
37 These sequences revealed significant diversity across samples, including four novel *lipL32*  
38 phylogenetic clades. Most samples from the serially sampled site were *lipL32* positive at each  
39 time point. We sequenced the genomes of six saprophytic and two pathogenic *Leptospira*  
40 isolates; the latter represent a novel pathogenic *Leptospira* species likely belonging to a new  
41 serogroup.

42 **Conclusions/Significance:** Diverse and novel pathogenic *Leptospira* are widespread in the  
43 environment in Puerto Rico. The disease potential of the novel lineages is unknown but several  
44 persisted for >1 year in soil, which could contaminate water. This work increases understanding  
45 of environmental *Leptospira* and should improve leptospirosis surveillance and diagnostics.

## 46 **Author Summary**

47 Leptospirosis is a common zoonotic disease worldwide, but more prevalent in the tropics. Cases  
48 are more common following severe weather events, possibly due to flooding, which may more  
49 readily distribute soil and/or water contaminated with *Leptospira* spp., the disease agents.  
50 Human cases increased following the 2017 hurricanes that ravaged Puerto Rico (Maria and  
51 Irma), prompting environmental sampling of soil and water to assess the presence, abundance,  
52 and persistence of pathogenic leptospires in these environments. The goal was to better  
53 understand these potential reservoirs of human and animal disease. Divergent and novel  
54 groups of pathogenic *Leptospira* were abundant and widespread in soil and water in Puerto  
55 Rico and sometimes persisted in these environments for >1 year. However, most groups we  
56 identified have not previously been described from humans and/or other animals, so the  
57 disease potential of these novel organisms is unknown. The results of this study reveal a  
58 tremendous amount of previously uncharacterized *Leptospira* diversity in soil and water in  
59 Puerto Rico, which could contribute to cryptic disease. The description and characterization of  
60 these novel types improves our understanding of the genus *Leptospira*, and will aid in the  
61 development of improved diagnostics and preventative tools to advance public health outcomes.

## 62 Introduction

63 Leptospirosis is a one-health zoonotic disease of worldwide importance (1) and the most  
64 widespread zoonosis globally, affecting a wide variety of mammalian species (2, 3). It is caused  
65 by pathogenic bacteria of the genus *Leptospira*. There are three broad groups of leptospires  
66 within the genus that are categorized based upon 1) phylogenetic similarities, 2) *in vitro*  
67 phenotypes, and 3) actual or presumed pathogenicity (*i.e.*, the presence of the *lipL32*  
68 pathogenicity gene) (1, 4). To date, across four groups, there are 17 described species in the  
69 pathogenic group (group P1), 21 species in the intermediate group (P2), and 26 in the  
70 saprophytic groups (S1 and S2) (1).

71 Leptospires are obligate aerobic spirochetes that are highly motile and slender (0.15 ×  
72 10–20µm) (5). Their genomes are comprised of two circular chromosomes and are larger than  
73 other spirochetes and more diverse than those of many other bacterial genera (6) due to  
74 horizontal gene transfer and gene duplication (7). This potentially facilitates an increased ability  
75 to survive in a variety of hosts (humans, domestic and wild animals), environmental conditions  
76 (soil and water), and climates (tropical, temperate, etc.) (6, 8).

77 Leptospirosis is maintained in animal reservoir hosts, such as rodents, cattle, and  
78 domestic dogs (9, 10), with humans serving as incidental hosts. Leptospires colonize the  
79 proximal renal tubules of infected animals and these reservoir hosts then excrete leptospires in  
80 their urine, thereby contaminating the environment wherein leptospires can survive under  
81 moist conditions (11) and infect other susceptible hosts (1, 12). Transmission of leptospirosis  
82 typically occurs via direct contact with infected urine or indirectly through exposure to  
83 contaminated soil and water (12). Leptospirosis infections in animals may become chronic and

84 can last for months or years (13). During chronic infection the shedding of leptospire in urine is  
85 intermittent (14), which convolutes the identification of infected animals and disease mitigation  
86 efforts.

87         Leptospirosis is a major global public health concern that disproportionately affects  
88 resource-poor populations (15), especially developing countries with poor sanitation and dense  
89 urban centers where rats, a common reservoir host, are abundant (12). Thus, people living in  
90 urban centers and those directly exposed to infected livestock animals seem to be at highest  
91 risk for leptospirosis, probably due to increased exposure rates (16). Recent estimates of global  
92 human disease cases are 1.03 million annually, including 58,900 deaths (15); 73% of cases occur  
93 in the tropics (17).

94         In the United States (US), leptospirosis is considered endemic with most human cases  
95 arising in Puerto Rico and Hawaii (17). Leptospirosis was first reported in Puerto Rico in 1942  
96 (18) and it is common in other parts of the Caribbean: 12,475 human cases were reported by  
97 nine Caribbean countries between 1980 and 2005 (19). Despite this, it was removed from the  
98 US reportable disease list in 1995 but later reinstated in 2014. During this time (1995-2014) and  
99 despite the lack of requirement to report this disease, 759 cases of leptospirosis were reported  
100 in Puerto Rico; 570 of these were confirmed, including 92 deaths. A retrospective analysis of  
101 these cases by Santiago-Ramos *et al.* (18) identified a trend between annual case rates and  
102 annual precipitation, although case rates were homogenous across Puerto Rico (*i.e.*,  
103 geographical hot spots were not identified). Most cases occurred in males and in densely  
104 populated urban areas (18).

105           Heavy rains and floods have been identified as major risk factors for human  
106 leptospirosis, particularly in tropical regions and on islands (20). Hurricanes are associated with  
107 leptospirosis outbreaks (17, 21-23), and the severity of these major storms can be amplified  
108 due to conditions associated with climate change (*e.g.*, increased ambient temperatures and  
109 humidity). Hurricane Hortense in 1996 (24) and the 2017 hurricanes Irma and Maria caused  
110 major damage to infrastructure across Puerto Rico, which limited access to potable water, as  
111 well as electricity, communications, and transportation (25). In just the three months following  
112 hurricanes Maria and Irma (26), the US Centers for Disease Control and Prevention (CDC)  
113 identified 85 leptospirosis cases, including 14 deaths, which was greater than the reported  
114 annual cases for any of the three previous years (2014-2016; 45-73 annual cases) (CDC personal  
115 communication).

116           Although some current thinking suggest pathogenic leptospires are unable to multiply in  
117 the environment (27, 28), leptospirosis has nonetheless been considered an environmentally-  
118 borne infection (29) because indirect contamination via the environment is the most frequent  
119 source of human infection (28). However, in recent years the use of the term “environmental  
120 reservoirs” for leptospirosis has increased, particularly when referring to moist soil in endemic  
121 regions (28), and the discovery of novel, pathogenic leptospires persisting in these  
122 environments (this study and (1)) supports the adoption of this term. Although moist soil  
123 conditions seem to be associated with environmental persistence of leptospires (30-32) little is  
124 known about the duration of survival in the environment (28, 33). Environmental surveys are  
125 thus of critical importance toward our understanding of these environmental reservoirs and  
126 their role in the persistence and proliferation of pathogenic leptospires, as well as their

127 potential role in disease transmission. To this end, we conducted environmental surveys in  
128 Puerto Rico after the two 2017 hurricanes to: 1) characterize the prevalence and geographic  
129 distribution of pathogenic *Leptospira* spp. in soil and water, 2) understand the diversity of  
130 pathogenic strains that occupy these environments, 3) investigate persistence of pathogenic  
131 *Leptospira* spp. in moist soil, and 4) isolate and characterize pathogenic *Leptospira* spp.  
132 persisting in soil in Puerto Rico.

## 133 **Methods**

### 134 **Sample collection**

135 The focus of our environmental sampling efforts, conducted over three time periods  
136 (Dec 3-14, 2018; Feb 9-23, 2019; and Feb 13-14, 2020), were 12 municipalities in Puerto Rico  
137 (**Figure 1**) in which there is a potentially higher leptospirosis risk to humans based on previous  
138 human and canine leptospirosis cases and environmental factors, such as areas prone to  
139 flooding and poor sanitation (18). We collected 440 samples (10 water and 10 soil per site) from  
140 22 field sites within these municipalities (**Table S1**); we targeted urban rivers and canals as well  
141 as runoff sites and/or flood zones near livestock farms where urine contamination from  
142 livestock was likely. At each site we established five short (<3m) linear transects and collected  
143 two soil samples (~50g each) and two water samples (>150mL each) per transect (sampling  
144 strategy illustrated in **Figure S1**). For each transect, the first soil sample was collected from the  
145 edge of the water and the second soil sample was 1m back and directly perpendicular to the  
146 edge of the water. Likewise, the first water sample was collected at the edge of the water and  
147 the second water sample was collected 1m beyond and perpendicular to the edge of the water

148 **(Figure S1)**. Soil samples were collected  $\leq 10$ cm below the surface and placed into 50mL  
149 capacity conical tubes and, when possible, water samples were collected from stagnate or less  
150 turbulent areas of the subsurface water (10-30cm deep) into a Whirl-Pak. For site 22, collection  
151 in transects was not possible due to access constraints at this urban canal. At that site we  
152 collected 10 water and 10 soil samples within  $\leq 1$ m of the edge of the water. For soil samples at  
153 all sites we recorded approximate elevation of the samples relative to the water, in meters. Soil  
154 elevation was categorized into four groupings: 0-0.33m, >0.33-0.66m, >0.66-1m, and >1m  
155 **(Table S2)**. Finally, we revisited one pathogenic *Leptospira* spp. positive site in San Juan (site 16)  
156 that was identified during collection period 1 (Dec 3-14) twice more, once in February 2019 and  
157 again in February 2020 **(Figure 1)**. In February 2019 we collected 10 additional soil samples at  
158 this site in a linear transect along the edge of the water in the same location where the  
159 previous positive soil samples were collected. In February 2020, for the purpose of culturing  
160 attempts to obtain live leptospire, we collected 20 soil samples at this site clustered at the  
161 edge of the water (two clusters of 10 samples) where we detected a high abundance of  
162 pathogenic *Leptospira* DNA from the previous two collection periods.

163 **Figure 1: Map of Puerto Rico indicating sites where environmental samples were collected for**  
164 **the detection of pathogenic *Leptospira* spp. DNA from 2018-2020.** Black dots represent paired  
165 water and soil sites (n=22); 20 samples were collected from each site (10 soil and 10 water).  
166 Yellow triangles indicate sites where pathogenic *Leptospira* DNA was detected (15/22 sites).  
167 One site in San Juan (site 16, red circle) was serially sampled three times over a 14-month  
168 period to assess persistence of pathogenic *Leptospira* in soil.



## 169 **Soil and water processing**

170 Water samples (150mL) were filtered through a 250mL capacity 0.22µm nitrocellulose  
171 filter as previously describe (34); afterward the filter was cut in half using sterile scissors and  
172 half of the filter was placed in a 5mL DNeasy® PowerWater DNA bead tube (Qiagen, Valencia,  
173 CA, USA) and refrigerated at 4°C until shipment to the laboratory. Prior to filtering, 1mL of each  
174 homogenous water sample was placed in a 2mL capacity screw-cap tube for downstream pH  
175 testing. We collected pH values directly from the water sample using a 6mm glass pH probe  
176 (Cole-Parmer, Vernon Hills, IL, USA, Part # EW-55510) and from soil using methods outlined by  
177 Hall *et al.*, 2019 (34) (**Table S2**).

## 178 **DNA extractions**

179 DNA extractions were conducted in a class II A2 biosafety cabinet (BSC) as required by  
180 our USDA-APHIS-PPQ soil transport permit. DNA was isolated from water filters using DNeasy®  
181 PowerWater DNA extraction kits (Qiagen, Valencia, CA, USA) following the recommendations of  
182 the manufacturer, and from ~0.5g of soil using Qiagen PowerSoil DNA extraction kits (Qiagen,  
183 Valencia, CA, USA) following previously published conditions (35) with one modification: after  
184 the addition of solution C3, the sample was incubated at 4°C overnight. DNA extractions were  
185 assessed for overall quality and bacterial abundance using a universal 16S real-time PCR assay  
186 as previously described (35); this quality control step is necessary prior to conducting a  
187 pathogen detection PCR assay because it provides confidence that a negative result truly  
188 reflects the absence of pathogen DNA and not a technical failure associated with poor quality  
189 or low yield DNA extracts.

## 190 ***Leptospira* qPCR detection and direct sequencing**

191 All DNA extracts were screened in triplicate 10 $\mu$ L PCRs to detect the presence of DNA  
192 from pathogenic *Leptospira* spp. using the *lipL32* TaqMan<sup>®</sup> real-time PCR assay (4) containing  
193 the following: 1x TaqMan<sup>®</sup> Environmental PCR master mix (Applied Biosystems, Foster City, CA,  
194 USA), 0.9 $\mu$ M of each primer, 0.45 $\mu$ M of the MGB probe, and 1 $\mu$ L undiluted DNA template.  
195 Quantitative PCRs were run interchangeably on Applied Biosystems QuantStudio<sup>®</sup> (QS) QS7 and  
196 QS12 Real-Time PCR Systems with QS 12K Flex or QS Real-Time PCR software, as appropriate,  
197 under the following conditions: 50°C for 2 minutes, 95°C for 10 minutes, and 45 cycles of 95°C  
198 for 15 seconds and 58°C for 1 minute. Positive (*L. interrogans* strain Fiocruz L1-130) and non  
199 template controls were included on all runs. *LipL32* amplicons from all positive samples were  
200 subjected to direct Sanger sequencing to confirm that the amplified product was *Leptospira*,  
201 using the same forward and reverse primers for the PCR (all replicates from a single sample  
202 were sequenced independently). Treatment and sequencing conditions are described below.

## 203 ***secY* 203bp amplification**

204 All samples that yielded a positive PCR result with the *lipL32* assay (defined as  
205 amplification of at least 1 of 3 replicates with a  $C_t < 45$ ) were also subjected to PCR amplification  
206 of the *secY* gene; we amplified a 203bp fragment using the “SecYIVF” and “SecYIVR” primers  
207 designed to amplify pathogenic *Leptospira* spp. as described in Ahmed *et al.*, 2009 (36). PCRs  
208 were carried out in 10 $\mu$ L volumes containing the following reagents (given in final  
209 concentrations): 1 $\mu$ L of 1/25 diluted DNA template (none of the PowerWater<sup>®</sup> extractions were  
210 diluted), 1x SYBR<sup>®</sup> Green Universal master mix (Applied Biosystems, Foster City, CA, USA), 1.2M

211 betaine, 0.2U Platinum® *Taq* DNA polymerase (Invitrogen, Carlsbad, CA, USA) to improve  
212 efficiency, and 0.4µM of each primer. The assay was run on an Applied Biosystems 7500 Fast  
213 Real-Time PCR System with SDS 7500 software v2.0.6 under the following conditions: 50°C for 2  
214 minutes, 95°C for 10 minutes, and 40 cycles of 95°C for 15 seconds and 57°C for 1 minute.  
215 Positive and non template controls were included on all runs. Due to the low abundance of  
216 *Leptospira* DNA in many of these samples, triplicate reactions were employed to increase the  
217 number of *secY* sequences generated; frequently only a single reaction (out of three) would  
218 yield an amplicon.

### 219 ***secY* 549bp amplification**

220 We also attempted to sequence a 549bp region of the *secY* gene for all *lipL32* positive  
221 samples to gain more phylogenetic resolution for certain samples and increase the number of  
222 *secY* sequences generated for this dataset. We used primer pair F-ATGCCGATCATTTTTGCTTC  
223 and R-CCGTCCCTTAATTTTAGACTTCTTC, which were designed to amplify pathogenic *Leptospira*  
224 spp. as previously described (37). Duplicate PCRs were carried out in 10µL volumes containing  
225 the following reagents (given in final concentrations): 1µL of 1/25 diluted DNA template  
226 (undiluted for all PowerWater extractions), 1x PCR buffer, 2.5mM MgCl<sub>2</sub>, 0.2mM dNTPs, 0.8U  
227 Platinum® *Taq* DNA polymerase, and 0.4µM of each primer. PCRs were thermocycled according  
228 to following conditions: 95°C for 10 minutes to release the polymerase antibody, followed by 38  
229 cycles of 94°C for 60 seconds, 55°C for 30 seconds, and 72°C for 30 seconds, and a final  
230 extension step of 72°C for 10 minutes to ensure completion of the fragments. Positive and non  
231 template controls were included on all runs.

## 232 **Sanger sequencing**

233 For all three amplicons (*lipL32*-242bp, *secY*-203bp, and *secY*-549bp), PCR products were  
234 visualized on a 2% agarose gel to ensure that the products were of the expected size and  
235 treated with 1 $\mu$ L of ExoSAP-IT (Affymetrix, Santa Clara, CA, USA) added to 7 $\mu$ L of PCR product  
236 under the following conditions: 37°C for 15 minutes followed by 80°C for 15 minutes. Treated  
237 products were then diluted (based on amplicon intensity) and sequenced in both directions  
238 using the same forward and reverse primers from the PCR in a BigDye<sup>®</sup> Terminator v3.1 Ready  
239 Reaction Mix (Applied Biosystems, Foster City, CA, USA). We used 10 $\mu$ L volumes for sequencing  
240 reactions containing the following reagents (given in final concentrations): 5x Sequencing  
241 Buffer, 1 $\mu$ L BigDye<sup>®</sup> Terminator v3.1 Ready Reaction Mix, 1 $\mu$ M primer, and 5 $\mu$ L diluted PCR  
242 product. The following thermocycling conditions were used: 96°C for 20 seconds, followed by  
243 30 cycles of 96°C for 10 seconds, 50°C for 5 seconds, and 60°C for 4 minutes. Sanger sequences  
244 were assembled and primers were manually removed using SeqMan Pro (DNASTAR Lasergene,  
245 Madison, WI, USA), resulting in sequence lengths of 202bp (*lipL32*-242bp), 162bp (*secY*-203bp),  
246 and 504bp (*secY*-549bp). FASTA database files for each gene (*lipL32* and *secY*) were generated  
247 in BioEdit (38); sequences from both *secY* amplicons (162 and 504bp) were combined into a  
248 single FASTA file.

## 249 ***lipL32* high fidelity amplicon sequencing**

250 Sanger sequences from a subset of samples displayed multiple genotypes from replicate  
251 amplicons and/or heterogeneous nucleotide calls in a single sequence, suggesting multiple  
252 *Leptospira* spp. genotypes (*i.e.*, mixtures). Also, within some *lipL32* positive samples the

253 concentration of *Leptospira* spp. DNA was too low to sequence using traditional Sanger  
254 sequencing methods. Thus, to recover sequences from these low-level positives and identify  
255 and characterize individual genotypes within these mixtures, we employed a high fidelity  
256 amplicon sequencing approach (AmpSeq) that enables differentiation of alleles without the  
257 need for traditional cloning and sequencing of the PCR amplicon while providing confidence in  
258 the detection and sequencing accuracy of low level positives (39). We amplified the same  
259 242bp fragment of the *lipL32* gene described above in triplicate reactions using modified  
260 primers that incorporated universal tails (39). The PCR setup and conditions for this modified  
261 *lipL32* AmpSeq assay were the same as described above. Replicates were pooled and sequence  
262 libraries were prepared for all positive samples as previously described (39), except a 1x  
263 Agencourt AMPure XP (Beckman Coulter, Indianapolis, IN, USA) bead cleanup was used.  
264 Uniquely indexed sample libraries were pooled together in equimolar amounts and sequenced  
265 on an Illumina MiSeq instrument using a 500 cycle (2 x 250) MiSeq Reagent Kit v2 Nano with  
266 PhiX control (Illumina, San Diego, CA, USA, part# MS-103-1003). We sequenced all *lipL32*  
267 positive soil and water samples (n=86) in parallel on a single run.

## 268 **Illumina sequence processing and *lipL32* phylogenetic analysis**

269 Paired-end Illumina reads were processed within QIIME 2 (v2019.7 and 2020.6) (40);  
270 primers were trimmed with cutadapt (41). The DADA2 (42) QIIME 2 plugin was used for quality  
271 trimming (--p-trunc-len-f 115 --p-trunc-len-r 110), denoising, dereplication of sequences, and  
272 chimera removal. *LipL32* sequences were identified with BLASTN (43) searches of  
273 representative sequences against the NCBI nr/nt database (NCBI Resource Coordinators 2016)  
274 and BLAST databases consisting of *lipL32* Sanger sequences generated from *Leptospira* positive

275 samples as part of this study. *LipL32* Illumina and Sanger sequences were combined with 538  
276 publically available *lipL32* sequences that were extracted from whole genomes (GenBank  
277 accession numbers in **Table S3**) using BLASTN v2.9.0+ (44) (*lipL32* sequence from *L. interrogans*  
278 strain Fiocruz L1-130 was used as a reference) and aligned with MUSCLE (v3.8.31) (45).  
279 Phylogenetic analysis was conducted using MEGA version 7 (46) and a maximum likelihood  
280 phylogeny was inferred using the Tamura-Nei model; bootstrap values were calculated using  
281 1,000 replicates.

## 282 ***secY* phylogenetic analysis**

283 Near full-length *secY* gene sequences (~1,300bp) were extracted from publicly available  
284 genome assemblies (**Table S3**) with BLASTN (v2.2.29) (47). These nucleotide sequences were  
285 combined with Sanger sequences generated from environmental samples in this study (162bp  
286 and 504bp amplicons) and aligned with MUSCLE (v3.8.31) (45). A maximum likelihood  
287 phylogeny was inferred with IQ-TREE (v1.6.12) (48) using the best-fit model (TIM+F+I+G4)  
288 identified by ModelFinder (49) and the UFBoot2 ultrafast bootstrapping (50) and SH-aLRT (51)  
289 options.

## 290 **Statistical analyses**

291 We tested for associations between environmental and sampling variables and the  
292 detection of pathogenic *Leptospira spp.* in soil and water (**Table S2**). Sampling variables were  
293 not available for 13 soil samples and site 22 was removed entirely from this analysis because  
294 the sampling strategy for this site was different from the other sites (see above). Sample sizes  
295 used for each test are listed in **Table S4**. For categorical variables (sample type, location, and

296 elevation), we used chi-square tests of independence, whereas for pH (a continuous variable)  
297 we used Wilcoxon Rank Sum (W) test because these data were not normally distributed.  
298 Categories for each environmental and sampling variable are described above under “Sample  
299 collection” and “Soil and water processing” and listed in **Table S2**; *p*-values of <0.05 were  
300 considered significant. All analyses were conducted in R studio v3.6.1 with tidyverse and  
301 ggplot2 packages (52).

## 302 **Soil culturing**

303 Ten grams of soil samples were resuspended in 20mL of sterile water in 50mL conical  
304 tubes, vigorously vortexed, and allowed to settle for 15 minutes for sedimentation of solid  
305 matter. Supernatants were filtered through a 0.45µm filter as a selection step to remove larger  
306 bacteria, and 2mL of filtrate was used to inoculate either a 2x HAN (53) or 2x EMJH media  
307 (Difco, BD, Franklin Lakes, NJ, USA), both containing STAFF (54). EMJH cultures were grown at  
308 29°C and HAN cultures were prepared in duplicate for growth at both 29 and 37°C. Each culture  
309 was assessed daily by dark-field microscopy and, upon reaching high densities of growth (>10<sup>8</sup>  
310 spirochetes/mL), an aliquot was removed for fluorescent antibody testing prior to storage in  
311 liquid nitrogen for downstream analysis.

## 312 **Fluorescent Antibody Test (FAT)**

313 Ten microliters of cultured samples were placed on a glass slide with a 7mm well as  
314 previously described (55). Briefly, slides were air dried overnight and fixed in acetone for  
315 15 minutes and then placed in a humid chamber; 50µL of rabbit anti-LipL32 sera (1:250) was  
316 added to each spot and then incubated for 1 hour at 37°C. Next, slides were washed for

317 10 minutes in PBS with gentle rocking and incubated with secondary Alexa Fluor 488 F(ab')<sub>2</sub>  
318 goat anti-rabbit IgG (Invitrogen, Waltham, MA, USA) for 1 hour at 37°C in the dark. After  
319 extensive washing, slides were dried and counterstained for 15 seconds with Flazo Orange  
320 (1:50, National Veterinary Services Laboratory). Slides were then rinsed with PBS and mounted  
321 using ProLong™ Diamond Antifade Mountant with DAPI (Thermo Fisher, Waltham, MA, USA).  
322 Microscopic examination was done using a Nikon Eclipse E800 microscope and B2-A filter  
323 (excitation, 450–490 nm; emission, 520 nm) at 400× magnification (56).

## 324 ELISA

325 Cultured spirochetes from soil were recovered from liquid media (4,000 x g for 15  
326 minutes), washed twice with PBS, and resuspended in 500 μL of PBS. Cells were counted by dark  
327 field microscopy, suspensions were brought to a concentration of 5x10<sup>7</sup> spirochetes/mL, and  
328 100 μL (~5x10<sup>6</sup>) was used to coat individual wells on ELISA plates in triplicate (Thermo Fisher,  
329 Waltham, MA, USA) for 16 hours at room temperature. Plates were then washed three times  
330 with PBS and blocked with PBS-containing 1% bovine serum albumin (BSA) for 1 hour at 29°C.  
331 For detection of pathogenic leptospire within the sample population, wells were incubated for  
332 1 hour with polyclonal rabbit anti-LipL32 (1:1,000 in blocking buffer) followed by secondary  
333 horseradish peroxidase-conjugated goat anti-rabbit IgG (1:3,000). Wells were washed six times  
334 and reactivity was revealed by the addition of 100 μL of TMB substrate (SeraCare, Milford, MA,  
335 USA) for 15 minutes. Reactions were stopped with 50 μL of TMB STOP™ Solution and optical  
336 densities were taken at 620 nm in a 96-well plate reader. Sample analysis was performed in  
337 triplicate. Positive and negative controls were comprised of wells coated with 100 μL (containing



338  $5 \times 10^6$ ,  $2.5 \times 10^6$ ,  $1.25 \times 10^6$ , or  $6.25 \times 10^5$ ) of *L. interrogans* serovar Copenhageni (LipL32 positive)  
339 and  $100 \mu\text{L}$  ( $5 \times 10^6$ ) *L. biflexa* serovar Patoc (LipL32 negative), respectively.

## 340 **Selection and culture of pathogenic leptospire**

341 ELISA and FAT-positive mixed cultures were enumerated by dark field microscopy and  
342 leptospire were diluted in HAN media to  $10^4$  cells/mL;  $100 \mu\text{L}$  was spread onto HAN agar plates  
343 supplemented with 0.4% rabbit serum (56) and incubated at  $37^\circ\text{C}$  until colonies were visible.  
344 Individual colonies were then harvested from the plates, vigorously homogenized in  $100 \mu\text{L}$  of  
345 HAN for microscopic visualization and, after confirmation of motile leptospire,  $10 \mu\text{L}$  of each  
346 suspension was used for coating FAT slides for LipL32 detection, as described above. The  
347 remaining sample was maintained at  $29^\circ\text{C}$  and, in the event of a positive FAT with anti-LipL32,  
348 used to inoculate fresh HAN media. Cultures were grown at  $37^\circ\text{C}$ , harvested at mid-log phase,  
349 and were further confirmed as pathogens by PCR with the *lipL32* and *secY*-549bp primer sets  
350 described above. *SecY* amplicons were Sanger sequenced (as above) to identify and  
351 differentiate individual colonies.

## 352 **WGS sequencing of isolated leptospire**

353 Genomic DNA was extracted from isolated colonies using DNeasy kits (Qiagen, Valencia,  
354 CA, USA) according to the recommendations of the manufacturer, except the buffer AL  
355 incubation step occurred at  $80^\circ\text{C}$  for 1 hour. The gDNA was assessed for quality and quantity on  
356 a 0.7% agarose gel using  $\lambda$  DNA-HindIII Digest (New England Biolabs, Ipswich, MA, USA). WGS  
357 library construction was performed using the KAPA Hyper Prep Kits for Illumina NGS platforms  
358 per the manufacturer's protocol with double-sided size-selection performed after sonication

359 (KAPA Biosystems, Woburn, MA, USA, part# KK8504). The adapters and 8bp index oligos  
360 purchased from IDT® (Integrated DNA Technologies, San Diego, CA, USA), based on Kozarewa  
361 and Turner, 2011 (57), were used in place of those supplied in the KAPA preparation kit. The  
362 final libraries were quantified on an Applied Biosystems™ QuantStudio™ 7 Flex Real-Time PCR  
363 System using the KAPA SYBR® FAST ROX Low qPCR Master Mix for Illumina platforms (part#  
364 KK4873). The libraries were then pooled together at equimolar concentrations and quality was  
365 assessed with a Bioanalyzer High Sensitivity DNA kit (Agilent Technologies, Santa Clara, CA, USA,  
366 part# 5067-1504). Final quantification by qPCR preceded sequencing of the final library. The  
367 samples were sequenced on an Illumina MiSeq using the 600-cycle v3 kit (part# MS-102-3003)  
368 with the standard Illumina procedure. The appropriate sequencing primers were added to the  
369 MiSeq kit as previously described (57).

## 370 **WGS phylogenetic analysis**

### 371 **External genomes**

372 Publically available *Leptospira* genomes were downloaded from the GenBank assembly  
373 database (58) with the ncbi-genome-download tool ([https://github.com/kbclin/ncbi-genome-](https://github.com/kbclin/ncbi-genome-download)  
374 [download](https://github.com/kbclin/ncbi-genome-download)) on September 9th, 2021. Genomes were renamed to include the assembly accession  
375 and taxonomic information. The dataset resulted in a set of 802 reference genomes that  
376 included pathogenic, intermediate, and saprophytic leptospires (**Table S3**).

### 377 **Genome assembly**

378 Raw reads were trimmed with `bbduk.sh` (v38.92)  
379 (<https://sourceforge.net/projects/bbmap/>) and assembled with SPAdes (v3.13.0) (59). Reads

380 were mapped back against contigs with minimap2 (v2.22) (60) and the depth of coverage was  
381 calculated with Samtools (v1.13) (61). Two hundred nucleotides from each contig were aligned  
382 against the GenBank nt database with BLASTN (v.2.11.0) (44) and the taxonomy of the top hit  
383 was recorded. Contigs with an anomalously low depth of coverage or aligned against  
384 contaminants were manually removed.

### 385 ***Leptospira dendrogram***

386 Pairwise MASH distances (62) were calculated on all *Leptospira* genomes and a  
387 dendrogram was generated with mashPy  
388 (<https://gist.github.com/jasonsahl/24c7cb0fb78b4769521752193a43b219>), a tool that  
389 incorporates SciPy (63) and Skbio (<http://scikit-bio.org>).

### 390 **Average nucleotide identity**

391 Average nucleotide identity (ANI) between the novel *Leptospira* spp. described herein  
392 and *L. yasudae* strain 201601115 was calculated using the ANIb stat in PYANI (v0.2.11) as  
393 described previously (64)

### 394 **SNP and indel discovery**

395 Genome assemblies were annotated with Prokka (v1.14.6) (65). Reads were aligned  
396 against each reference and SNPs and indels were called with Snippy (v4.6.0)  
397 (<https://github.com/tseemann/snippy>) using default parameters.

### 398 **Core genome SNP phylogenies**

399 For pathogenic genomes, assemblies were aligned against *Leptospira kmetyi* strain LS-  
400 001/16 (GCA\_003722295.1) with NUCmer (v3.1) (66) and SNPs were called with NASP (v1.2.0)

401 (67); SNPs that fell within duplicated regions, based on a reference self-alignment with  
402 NUCmer, were filtered from downstream analyses. A maximum likelihood phylogeny was  
403 inferred on the concatenated SNP alignment with IQ-TREE (v2.0.3) (68) in conjunction with  
404 ModelFinder (49) and rooted with *Leptospira interrogans* FDAARGOS 203 (GCA\_002073495.2).  
405 The reference genome, *Leptospira montravelensis* strain 201800278 (GCA\_004770045.1), was  
406 used for the phylogeny including saprophytic genomes, which was rooted by *Leptospira*  
407 *noumeaensis* strain 201800287 (GCA\_004770765.1).

## 408 **Hamster infection with isolated colonies**

409 To assess virulence of the newly identified pathogenic isolate described herein, Golden  
410 Syrian hamsters were inoculated by intraperitoneal (IP) injection with  $10^8$  leptospires in 1mL as  
411 previously described (69). Negative control hamsters received 1mL of media alone. Animals  
412 were assessed for acute disease through day 11 post infection and euthanized on day 21 to  
413 provide ample time for renal carriage to develop. All animal experimental procedures were  
414 performed in accordance with relevant guidelines and regulations, and as approved by USDA  
415 institutional guidelines.

## 416 **Microscopic agglutination test (MAT)**

417 The MAT was performed according to OIE guidelines (70) at two-fold dilutions from an  
418 initial dilution of 1:50 to 1:6400 using 18 serovars of *Leptospira* spp. listed in **Table S5** and the  
419 newly identified pathogenic isolates described herein.

## 420 **Culture**

421           At three weeks post-infection, kidneys were harvested using aseptic techniques for  
422 culture of leptospires in T80/40/LH semi-solid media incubated at 29°C (71) and HAN semi-solid  
423 media incubated at both 29 and 37°C (53).

## 424 **Data sharing**

425           All WGS reads and assemblies generated during this study have been deposited in NCBI  
426 BioProject database under accession # PRJNA766613. The associated BioSample accession  
427 numbers for these isolates are sequentially assigned beginning with # SAMN21833208 and  
428 ending with # SAMN21833215. Likewise, SRA accession numbers for these isolates are  
429 sequentially assigned beginning with # SRR16134453 and ending with # SRR16134460. Partial  
430 gene sequences for *lipL32* and *secY* have been deposited in NCBI (accession numbers  
431 sequentially assigned beginning with # OK345072 and ending with # OK345268) and are also  
432 provided in Supplemental File 1 (**Table S6 and Table S7**).

## 433 **Results**

### 434 **Pathogenic *Leptospira* detection**

435           Pathogenic *Leptospira* spp. were common and distributed widely throughout Puerto  
436 Rico. Using *lipL32* PCR, we detected pathogenic *Leptospira* spp. DNA at 15 of 22 paired soil and  
437 water exploratory sites (68.2%) (**Figure 1**); 8/15 sites yielded positive soil samples only, 2/15  
438 positive water samples only, and 5/15 both positive soil and water samples (**Figure S2**). From  
439 these exploratory sites, 63 samples (out of 440) were positive, including 15 water and 48 soil  
440 samples. At the serially sampled soil site (site 16), an additional 23 (out of 30 total) soil samples

441 collected during the second and third visits to this site also were positive. In total, 86 positive  
 442 samples from Puerto Rico were detected. At five paired soil and water sites (sites 7, 12, 17, 21,  
 443 and 22) we detected pathogenic *Leptospira* spp. in both sample types (**Table 1** and **Figure S2**).  
 444 At four of these five sites (12, 17, 21, and 22) a higher proportion of soil samples were positive  
 445 than water samples and the phylogenetic clades represented in the water samples were a  
 446 subset of those identified in the corresponding soil samples (**Table 1**). This observation was not  
 447 possible at site 7 because only a single soil and a single water sample were *lipL32* positive and  
 448 *lipL32* sequence was not recovered from the positive soil sample (**Table S1**).

449 **Table 1: Table of all positive sites in Puerto Rico illustrating the relationship between *lipL32***  
 450 **genotypes found in soil and water.** In total, 15 sites were positive for pathogenic *Leptospira*  
 451 DNA; eight sites wherein only soil was positive, two sites wherein only water was positive, and  
 452 five sites wherein both soil and water were positive (highlighted in gray). At four of the latter  
 453 sites, the clades present in water were a subset of the clades identified in soil (bolded text),  
 454 suggesting that soil reservoirs may lead to the contamination of water.

| Site ID | Site Type | Proportion Positive | Clades                  |
|---------|-----------|---------------------|-------------------------|
| 1       | Water     | 0.1                 | 4b                      |
| 2       | Soil      | 0.2                 | 4a                      |
| 5       | Water     | 0.7                 | 1, 6                    |
| 7       | Water     | 0.1                 | 6                       |
| 7       | Soil      | 0.1                 | unknown                 |
| 10      | Soil      | 0.1                 | 4a                      |
| 11      | Soil      | 0.2                 | 4a                      |
| 12      | Water     | 0.1                 | <b>4b</b>               |
| 12      | Soil      | 0.6                 | 3, 4a, <b>4b</b> , 6, 9 |
| 13      | Soil      | 0.1                 | 6                       |
| 14      | Soil      | 0.4                 | 3, 4a, 4b, 9            |
| 15      | Soil      | 0.3                 | 4b                      |
| 16      | Soil      | 0.7                 | 4b, 6                   |
| 17      | Water     | 0.1                 | <b>6</b>                |
| 17      | Soil      | 0.4                 | 3, 4b, <b>6</b>         |
| 19      | Soil      | 0.3                 | 4b, 6                   |

|    |       |     |                          |
|----|-------|-----|--------------------------|
| 21 | Water | 0.1 | <b>6</b>                 |
| 21 | Soil  | 0.9 | 4a, 4b, <b>6</b> , 9     |
| 22 | Water | 0.3 | <b>4b</b> , <b>6</b>     |
| 22 | Soil  | 0.5 | <b>4b</b> , <b>6</b> , 9 |

455

## 456 **Gene sequencing *lipL32***

457            Sequencing of the *lipL32* amplicons revealed extensive and previously undescribed  
458 diversity in pathogenic *Leptospira* spp. at this locus. Using AmpSeq and Sanger sequencing  
459 methods, we generated 147 *lipL32* sequences from 83 of the 86 positive samples representing  
460 all 15 positive sites (**Table S1**) to: 1) confirm that the generated amplicons were from *Leptospira*  
461 DNA, and 2) assess genetic diversity of pathogenic *Leptospira* spp. within and across sites and  
462 samples; information on generated nucleotide sequences is provided in **Table S6**. Thirty-four  
463 alleles were identified in this dataset from Puerto Rico of which 32 were novel (*i.e.*, were not a  
464 100% nucleotide match to any available sequences in GenBank). We assigned either a high or  
465 moderate level of confidence to each newly identified allele. If a sequence was observed in  
466 more than one sample or was generated via Sanger sequencing methods, this allele was  
467 assigned a high level of confidence; 20 of 34 alleles met this criterion. The remaining 14 alleles  
468 were only observed in a single sample, only in the Illumina dataset, and/or with a low depth of  
469 coverage (3-42 paired end reads) and thus were assigned a moderate level of confidence. As a  
470 quality control step, we also translated all the *lipL32* sequences in frame to confirm that they  
471 resulted in functional amino acid sequences. Although the dual indexing and paired end  
472 analysis approach described above provides additional confidence in the accuracy of these  
473 sequences, we acknowledge that these putative alleles could benefit from further validation. As  
474 such, no major phylogenetic conclusions are inferred from these 14 lower confidence alleles

475 and none of these alleles define the novel *lipL32* clades described herein. However, all 34  
476 alleles were used to illustrate the diversity of pathogenic *Leptospira* spp. genotypes present in  
477 Puerto Rico soil and water.

## 478 **Gene sequencing *secY***

479 Unlike *lipL32*, which has only been documented in pathogenic leptospires, the *secY* gene  
480 is present in both pathogenic (P1 and P2) and saprophytic (S1 and S2) *Leptospira* groups (1, 72).  
481 It is also commonly used to obtain *Leptospira* spp. identification from clinical samples. Thus, to  
482 compliment the *lipL32* sequence data and provide support for phylogenetic membership to the  
483 pathogenic clade and the relationship to other pathogenic leptospires, we generated *secY*  
484 sequences for these environmental samples. This was an important quality control step  
485 because divergent alleles that have not previously been described from the *lipL32* gene were  
486 observed in these samples. Twenty-one *secY*-203bp sequences from 16 samples (3 water and  
487 13 soil) and 29 *secY*-549bp sequences from 23 samples (2 water and 21 soils) were generated  
488 (**Table S1**). In combination, *secY* sequences were generated from 32/86 positive samples  
489 representing 10/15 sites. All sequences fell within the pathogenic group of the *secY* phylogeny  
490 (**Figure S3**), thereby confirming the *lipL32* results; nucleotide sequences are provided in **Table**  
491 **S7**.

## 492 **Mixtures**

493 Sequences generated for the *lipL32* and *secY* genes revealed mixtures (multiple  
494 pathogenic genotypes) in 39 soil and two water samples from 12 sites; up to five unique *lipL32*  
495 genotypes in a single sample were identified (**Table S1 and Table S6**).



## 496 Phylogenetics

497 Phylogenetic analyses of *lipL32* sequences revealed a high level of genetic diversity  
498 among these samples, including four previously undescribed pathogenic *Leptospira*  
499 phylogenetic clades (3, 5, 8, and 9; **Figure 2 and Figure S4**); 18 sequences obtained from the  
500 environment in Puerto Rico assigned to these four clades. Clades 4 and 6 contain 128 *lipL32*  
501 sequences from Puerto Rico as well as environmentally acquired isolates from other locations  
502 (1). The two most common *lipL32* genotypes from soil and water in Puerto Rico were a perfect  
503 match to *L. gomenensis* in clade 6 (n=56) or a close match to *L. yasudae* (previously *L.*  
504 *dzianensis*) in clade 4b (n=28) (**Figure 2 and Figure S4**). Interestingly the *L. gomenensis*  
505 genotype was recently described in New Caledonia and *L. yasudae* (*L. dzianensis*) in Mayotte  
506 (1), suggesting that these environmental *Leptospira* spp. are distributed globally. The *secY*  
507 phylogeny provided additional confidence in the phylogenetic placement of these novel types  
508 because those genotypes were also a close match to *L. yasudae* and *L. gomenensis* (**Figure S3**).  
509 Interestingly, there also was sequence similarity to *L. santarosai* for some *secY* genotypes,  
510 including those from the newly acquired LGVF01 and LGVF02 isolates that are described herein  
511 (**Figure S3**). Clades 1, 2, and 7 of the *lipL32* phylogeny (**Figure 2 and Figure S4**) contain  
512 described pathogenic leptospires that are commonly found in human and animal infections: *L.*  
513 *interrogans*, *L. noguchii*, and *L. kirschneri* (clade 1); *L. borgpetersenii* and *L. santarosai* (clade 2);  
514 and *L. alexanderi*, *L. weilii*, and *L. mayottensis* (clade 7). A single sequence from site 5 assigned  
515 to clade 1 (**Figure 2 and Figure S4**) and no sequences from Puerto Rico assigned to clades 2 and  
516 7.

517 **Figure 2: Genetically diverse and previously undescribed lineages of pathogenic *Leptospira***  
518 **are widespread in Puerto Rico.** A) Maximum likelihood phylogeny constructed using a 202bp  
519 segment of the *lipL32* gene, including sequences obtained from soil and water samples  
520 collected in this study (blue text) and those available in public databases (black text). Nine  
521 major genetic clades are represented, seven of which were present in Puerto Rico, including  
522 four not previously described. Clades are labelled 1 through 9 on the tree and color coded. B)  
523 Sites where each major clade was collected, with colors within the pie charts corresponding to  
524 those in the phylogeny; superscript indicates if soil (S) and/or water (W) samples were positive  
525 at each site. Fifteen positive sites are included on this map.

## 526 **Detection Statistics**

527 We observed a significant association between the distribution (median) of pH values  
528 for samples collected from water that were positive (median pH=8.4) and negative (median  
529 pH=8.2) for pathogenic *Leptospira* spp. (W=550,  $p=0.0015$ ), but not from soil, where positive  
530 and negative median pH values were  $\sim 7.5$  regardless of pathogenic *Leptospira* status (W=3057,  
531  $p=0.9399$ ). We also detected pathogenic *Leptospira* spp. in soil more commonly than in water:  
532 48/210 (22.9%) of soil samples compared to 15/210 (7.1%) of water samples ( $\chi^2=15.087$ ,  
533  $p<0.001$ ). No other significant associations were observed among environmental/sampling  
534 variables and the detection of pathogenic *Leptospira* spp. (**Table S4**).

## 535 **Persistence in soil**

536 During our first sampling period (December 2018) we identified one exploratory site in  
537 an urban district of San Juan where seven soil samples (out of ten) tested positive for the

538 presence of pathogenic *Leptospira* spp. DNA (**Table S1**), the highest single site detection rate  
539 from this first period. We revisited the site two months later (February 2019) and collected an  
540 additional ten soil samples in a linear transect along the edge of the water to test the  
541 hypothesis that pathogenic *Leptospira* spp. persists in water-soaked soil at this site; all ten of  
542 the new soil samples tested positive for pathogenic *Leptospira* spp. DNA (**Table S1**). We  
543 revisited this site once again 14 months after the initial sampling period (February 2020) and  
544 collected 20 samples clustered along the edge of the water to use for live *Leptospira* spp.  
545 recovery and isolation attempts, as well as persistence analysis; 13 of these 20 soil samples  
546 tested positive for pathogenic *Leptospira* spp. DNA (**Table S1**). Thus, at all three time points the  
547 majority of soil samples collected at this site were positive for pathogenic *Leptospira* spp. DNA:  
548 7/10, 10/10, and 13/20 of samples, respectively (**Figure 3**). Among these positive samples,  
549 identical *LipL32* sequences from clades 4b and 6 were identified across all three time points  
550 (**Figure 3A**), suggesting these genotypes persisted in soil at this site.

551 **Figure 3: Site 16 in Caño Martín Peña, San Juan, Puerto Rico where sampling was conducted**  
552 **at three separate timepoints to assess environmental persistence of pathogenic *Leptospira* in**  
553 **soil near the edge of the water.** A) Maximum likelihood phylogeny of all *lipL32* sequences  
554 obtained from this soil site over the course of three sampling periods (color coded by date of  
555 sampling period); two of five clades detected at this site were identified at all three timepoints,  
556 suggesting environmental persistence. Clade colors correspond to Figure 2. Two isolates  
557 representing a novel pathogenic *Leptospira* species were obtained from soil sample 27 (red  
558 asterisk). B) Photo of exact location where samples 21-30 were collected and the isolates were  
559 obtained. C) Transect where 40 soil samples were collected over three sampling periods.

560 Balloons are color coded to indicate sampling period as in the phylogeny (panel A) and the red  
561 asterisk denotes the location where the *Leptospira* isolates originated. D) Location of site 16 in  
562 Caño Martín Peña.

### 563 **Quantification of pathogenic *Leptospira* spp. in soil cultures**

564 Single aliquots of culture from FAT-positive soil sample #27 and FAT-negative soil  
565 sample #40 (both from site 16) were defrosted in a water bath at 37°C and used for a  
566 confirmative FAT and for coating onto ELISA plates. As expected, sample #27 presented with a  
567 high proportion of LipL32-reactive leptospire (Figure S5A), which was quantified by ELISA  
568 (Figure S5B); approximately 50% of the mixed population was pathogens. In contrast, only basal  
569 reactivity was obtained when wells were coated with cells from sample #40, consistent with a  
570 small number, or absence of, pathogenic leptospire. Cultures were seeded onto HAN plates  
571 and incubated at 37°C in a 3% CO<sub>2</sub> atmosphere; colonies were typically observed in five days.  
572 Colonies were picked from both plates (27 colonies from sample #27 and 54 from sample #40),  
573 vigorously homogenized in liquid HAN, and the suspensions used to coat FAT slides. In strong  
574 agreement with ELISA results, 14 out of 27 colonies from sample #27 were FAT positive (51.9%),  
575 whereas none of the 54 colonies from sample #40 showed significant LipL32 reactivity.  
576 Representative FAT images of positive (colony 9 and 17) and negative (colony 8) clonal  
577 suspensions from sample #27 are presented in Figure S5C. FAT-positive cells were inoculated  
578 into liquid HAN and harvested at mid-log phase for PCR confirmation, wherein colony 8 was  
579 also employed as a negative control. All 14 FAT-positive cultures were also PCR-positive for  
580 both *lipL32* and *secY* and, as expected, no bands were observed when cells from colony 8 were  
581 used as a template (Figure S5D).

## 582 **Sequence identification of pathogenic colonies**

583 All *secY* amplicons were sequenced and the assembled sequences (446bp in length after  
584 trimming) were submitted to nucleotide alignment by BLASTN (43). The 14 clones presented an  
585 average identity of 95% to *L. santarosai* serovar Princetown strain TRVL 112499. We identified  
586 two clones (colony 9 and 18) that were slightly divergent from the other 12 and contained  
587 several SNPs within the *secY* sequence (**Figure S3 and Table S7**). One representative isolate of  
588 each genotype, designated as strain LGVF01 and strain LGVF02, respectively, were re-grown in  
589 liquid HAN for DNA extraction and whole genome sequencing. As a quality control step we also  
590 sequenced the *lipL32* gene from these isolates and confirmed that they matched the sequences  
591 we obtained from the originating soil samples.

## 592 **Isolation of other leptospire**

593 A total of 40 saprophytic isolates also were obtained during the purification process for  
594 pathogenic colonies. We sequenced near full length 16S rRNA fragments (1,330bp) for these  
595 isolates using universal primers (73) and identified two genotypes among them that differed by  
596 four SNPs. One genotype (16S-01) was a perfect match to *L. mtsangambouensis*, *L. jelokensis*, *L.*  
597 *noumeaensis*, *L. congkakensis*, *L. levettii*, and *L. macculloughii* and the other (16S-02) was a  
598 perfect match to *L. bandrabouensis*, *L. kemamanensis*, *L. bouyouniensis*, and *L. meyeri*; three  
599 representatives of each genotype were whole genome sequenced (**Table S8**).

## 600 **WGS**

601 In total, we generated whole genome sequences for two pathogenic and six saprophytic  
602 isolates obtained from a single soil sample (#27) at the serially sampled site 16 (**Figure 3**); the

603 former are two distinct strains of a novel pathogenic *Leptospira* species that differ from each  
604 other by 20,980 pairwise SNPs (4,982 non-synonymous) (**Figure 4B**). This novel pathogen  
605 species falls within clade 4b of the *lipL32* phylogeny (**Figure 2** and **Figure S4**) and is most closely  
606 related to, but is clearly distinct from, *L. yasudae*; the ANI between these species is 92.8%.  
607 Samples from five other positive soil sites and one water site from eastern Puerto Rico (sites 14,  
608 15, 17, 19, 21, and 22) share the same *lipL32* genotype found in this novel pathogenic species,  
609 suggesting it may be fairly common and widespread in Puerto Rico (**Figure 2**). The six  
610 saprophytic isolates represent three previously known species of *Leptospira*: they were  
611 genomically identified as *L. levettii* (n=1), *L. bandrabouensis* (n=4), and *L. mtsangambouensis*  
612 (n=1) (**Figure 4**). The 16S-01 genotype was conserved among the *L. levettii*, *L.*  
613 *mtsangambouensis*, and one of the *L. bandrabouensis* isolates, whereas the 16S-02 genotype  
614 was conserved among the remaining three *L. bandrabouensis* isolates (**Table S8**). The *L.*  
615 *bandrabouensis* isolate (Sapro03) that contained the 16S-01 genotype differed from the other  
616 three *L. bandrabouensis* isolates by >47,000 SNPs (**Figure 4B**). The genome assembly details for  
617 all eight isolates are provided in **Table S9**.

618 **Figure 4: Whole genome dendrogram of 802 known pathogenic, intermediate, and**  
619 **saprophytic *Leptospira* spp. isolates, including six saprophytic and two pathogenic isolates**  
620 **obtained in this study from a single soil sample from site 16.** A) Pairwise genomic distance  
621 dendrogram contextualizing the relationship among all known saprophytic (S1 and S2),  
622 intermediate (P2), and pathogenic (P1) *Leptospira* spp. reveals the pathogenic isolates LGVF01  
623 and LGVF02 represent two genotypes of the same previously undescribed pathogenic species,  
624 whereas the saprophytes belong to three known *Leptospira* spp. B) Detailed view of the S1

625 clade that contains four saprophytic isolates obtained during this study. This maximum  
626 likelihood phylogeny reveals significant diversity among isolates that fall within the *L.*  
627 *bandrabouensis* clade. C) Detailed view of the P1 clade that contains two pathogenic isolates  
628 obtained during this study. This maximum likelihood phylogeny reveals two genotypes of a  
629 novel pathogenic *Leptospira* spp. isolated from soil in Puerto Rico.

## 630 **Hamster infection and MAT response**

631 MAT reactivity was detected when sera from hamsters infected with the new  
632 pathogenic isolate LGVF02 were tested against the challenge isolate (LGVF02) at a 1:1600  
633 dilution. However, no experimentally infected hamsters showed clinical signs of infection or  
634 weight loss after inoculation (**Table S10**) and at three weeks post-infection all hamster kidneys  
635 were culture negative. In addition, at three weeks post-infection all hamsters were  
636 seronegative for the 18 serovars, representative of 15 serogroups, listed in **Table S5**.

## 637 **Discussion**

638 This study provides new insights into the persistence of pathogenic leptospire in the  
639 environment in Puerto Rico and raises important questions regarding host/environmental  
640 adaptation, genomic exchange, the evolution or acquisition of pathogenicity in the genus  
641 *Leptospira*, and the disease potential of environmental leptospire. Our results also  
642 demonstrate the need for updated diagnostics to detect and identify these novel and divergent  
643 types.

644 Our survey for pathogenic *Leptospira* spp. in the environment in Puerto Rico revealed  
645 that diverse and novel pathogenic types are widespread in soil and water across the island, and

646 more common in soil than water. Thirty-two previously undescribed *lipL32* alleles were  
647 identified, which suggests a vast amount of uncharacterized diversity within the pathogenic  
648 group of this genus present in the environment in Puerto Rico. However, we only identified a  
649 single sequence from one water sample that shared a *lipL32* genotype with *Leptospira* spp.  
650 from clade 1; species from clade 1 are commonly found in human leptospirosis infections. This  
651 might suggest that clade 1 types are not adapted for survival in soil and water. Indeed, host  
652 adaptation among these commonly identified pathogenic types has been suggested (7), which  
653 could explain the limited detection of these pathogenic types in soil and water in this study.  
654 This is in line with the described transmission dynamics of human leptospirosis in which  
655 infecting bacteria are maintained in the kidneys and renal tubules of animal reservoir hosts and  
656 excreted through urine whereby transient contamination of soil and water can occur, leading to  
657 human infections. In contrast, we identified 33 less common or novel *lipL32* alleles in these  
658 environmental samples whose disease potential is unknown. Although the pathogenicity of the  
659 novel types is yet to be determined, the presence of the *lipL32* gene suggests pathogenic  
660 potential in humans and animals. Of course it is also possible that the opposite is true and that  
661 the presence of the *lipL32* gene in these strains is not indicative of pathogenicity but perhaps an  
662 artifact of genetic exchange and recombination and/or serves some other purpose in these  
663 complex environments. Either way, the abundance and persistence of these types in soil and  
664 water suggests adaptation for survival, and potentially proliferation, in these environments.

665 In support of this hypothesis, we found evidence for *lipL32* positive *Leptospira* spp.  
666 persisting in water-soaked soil near the edge of the water for more than one year at an urban  
667 site in San Juan, Puerto Rico. Two of the five pathogenic genetic clades found in soil at this site



668 were resampled again at two months and 14 months after the initial sampling date. Although  
669 survival and proliferation in this environment seems the most likely explanation, possibly via  
670 formation of biofilms (74, 75), it is also possible that this site is continually contaminated from  
671 some other source. This same urban site was described in a 2015 study wherein the research  
672 team evaluated *Leptospira* seroprevalence in humans and carriage in rodents (76). It was  
673 determined in that study that *Leptospira* exposure was high in humans in this urban community  
674 (seroprevalence of 27.2%) but the species/serotypes identified in humans and the species  
675 identified and/or recovered from rodents in that study were not a match to those found in our  
676 study but, rather, were the commonly identified human and animal pathogens *L. borgpetersenii*  
677 and *L. interrogans*. However, it is important to point out that seroprevalence testing for this  
678 other study employed a MAT panel containing common human and animal pathogenic types  
679 only (27 serovars represented), so if exposure from these novel soil dwelling types had  
680 occurred they may not have been detected with this method.

681 Our discovery of so many novel genotypes at this urban site (n=8) and in Puerto Rico as  
682 a whole (n=32) highlights the need to address the limited scope of leptospirosis diagnostics  
683 (e.g., a MAT panel that does not include local strains), as it is possible that these novel  
684 pathogenic types also are associated with human and animal disease in Puerto Rico but remain  
685 undetected in the clinic. Indeed, it is thought that many cases of leptospirosis go undetected or  
686 are misdiagnosed as other febrile illnesses due to challenges with implementation and/or  
687 limitations of the diagnostic tools themselves (77, 78). If it were shown that these types  
688 contribute to human and animal disease and proliferation in the environment is experimentally  
689 confirmed, it would contradict the current dogma that pathogenic leptospires require an animal

690 reservoir host for maintenance and proliferation and, thus, suggest a much more complicated  
691 scenario of leptospirosis transmission that includes infection by soil dwelling leptospires.

692 From soil sampled at this urban site in San Juan we isolated a novel pathogenic  
693 *Leptospira* spp. (represented by strain LGVF02), which was confirmed to express LipL32 *in vitro*.  
694 Sera from infected Golden Syrian hamsters were positive by MAT when using the challenge  
695 strain, although no signs of acute disease were observed. Interestingly, sera from challenged  
696 hamsters were MAT negative when tested against a panel of 18 commonly tested strains  
697 representing 15 serogroups; as such, we suspect that this isolate represents an entirely novel  
698 serogroup and, thus, would not be detected using a MAT panel of common isolates.  
699 Importantly, the absence of disease symptoms in challenged hamsters does not negate its  
700 classification as a pathogen; other pathogenic *Leptospira* spp., including *L. borgpetersenii*, *L.*  
701 *mayottensis*, and *L. tipperaryensis*, have also failed to cause acute disease in Golden Syrian  
702 hamsters (79, 80). LGVF02 was also subjected to LipL32 gene silencing via CRISPRi as part of  
703 another study (56) and the results of that study (specifically, the detection of the LipL32 and  
704 LipL41 proteins) further support the pathogenic classification of this novel leptospire. The  
705 species description of LGVF02 will be treated in a separate publication in which we will  
706 investigate whether it represents an entirely new serogroup. Either way, the ability of strain  
707 LGVF02 to evade detection with MAT based on common isolates highlights the need to include  
708 regionally relevant isolates when conducting MAT in the clinic to ensure detection of these  
709 lesser known types and better understand their potential role in human and animal disease.

710 Our attempts to sequence two separate *secY* amplicons (*secY*-203bp and *secY*-549bp)  
711 from *lipL32* positive samples suggested that SNPs or other genetic mutations were present in

712 the PCR priming sites. We suspect this because *secY* PCR amplification was only achieved in 32  
713 of 86 (37%) *lipL32* positive environmental samples from Puerto Rico. Further evidence of this  
714 possibility is supported by other investigators; during the preliminary genome analysis of a  
715 recently acquired *L. kirschneri* isolate it was discovered that the reverse priming site for the  
716 *secY*-549bp PCR was missing entirely (Camila Hamond, NVSL, personal communication).  
717 Accordingly, this *L. kirschneri* isolate and originating sample failed to amplify with *secY*-549bp  
718 PCR. The poor performance of both *secY* PCRs with these environmental samples that displayed  
719 diverse *lipL32* genotypes, paired with the MAT evasion of the LGVF02 isolate described herein,  
720 again highlights the need for updated diagnostics that can account for this novel diversity.  
721 However, this goal requires the acquisition of genomes to first characterize this diversity in  
722 order that improved diagnostic targets can be developed.

723 We generated whole genome sequences for two pathogenic and six saprophytic  
724 *Leptospira* isolates obtained from a single soil sample collected from serially sampled site 16.  
725 The whole genome dendrogram contextualized the phylogenetic relationships of these isolates  
726 to all other known *Leptospira* spp. and revealed that the two pathogenic isolates, LGVF01 and  
727 LGVF02, were unique strains (separated by 20,980 SNPs) representing a single, novel pathogenic  
728 species. We classified these isolates as pathogenic based upon the presence of the *lipL32* gene  
729 in their genomes and the expression of the LipL32 protein, as well as their phylogenetic  
730 relationships to other species. The saprophytic isolates represent three known species, of which  
731 two (*L. bandrabouensis* and *L. mtsangambouensis*) have previously only been identified from  
732 the island of Mayotte in the Indian ocean, and the third (*L. levettii*) has previously been  
733 identified only in Mayotte, Malaysia, and New Caledonia. In other words, these three species

734 have not previously been identified in Puerto Rico, the Caribbean, or the Western Hemisphere.  
735 In total, four *Leptospira* species were isolated from a single 10g soil sample from site 16 in  
736 Puerto Rico, and the *lipL32* analysis from this same site identified four additional phylogenetic  
737 clades that were not represented by the isolates obtained from this sample (**Figure 3A**),  
738 suggesting the presence of even more pathogenic species in soil from this site. Finally, the SNP  
739 diversity identified among isolates within the same species from a single soil sample is  
740 considerable (20,980 between LGVF01 and LGVF02 and >47,000 SNPs differentiating two  
741 subgroups of *L. bandrabouensis*). Together, these findings reveal a tremendous amount of  
742 unrecognized *Leptospira* spp. diversity within the environment in Puerto Rico, and very likely  
743 many other geographic locations, that has yet to be characterized.

744         Soil may serve as a long-term reservoir for contamination of waterways with pathogenic  
745 *Leptospira* spp. in Puerto Rico. At four of the five sites where pathogenic leptospires were  
746 detected in both soil and water, the *Leptospira* clade(s) identified in water were a subset of  
747 those identified in soil and a higher proportion of soil samples were positive when compared to  
748 water samples at these sites. These observations suggest soil may serve as a reservoir for  
749 pathogenic *Leptospira* that leads to the contamination of waterways in Puerto Rico, which  
750 could occur when the soil is disturbed by animal or human activity, or during weather events  
751 such as heavy rains and floods. This is in line with the dynamics of *Leptospira* environmental  
752 contamination reviewed elsewhere (28). However, our findings also provide support for the  
753 hypothesis that some pathogenic *Leptospira* spp. are maintained in the soil long term, rather  
754 than just transiently being present due to urine contamination from an infected reservoir host.  
755 If this is the case, the potential for genetic exchange among pathogenic isolates that could lead

756 to the emergence of novel outbreak strains is something that needs to be explored further. A  
757 possible example of this may be the documented outbreak between 1999-2003 in Thailand that  
758 was associated with a novel type of *L. interrogans* that emerged, caused illness in humans for  
759 several years, and then inexplicably seemed to fade out (81). It is possible this type of outbreak  
760 is due to the exchange of genetic material among transiently present (via urine contamination)  
761 and soil dwelling pathogenic leptospires that result in increased pathogenic potential of certain  
762 strains in these complex environments. A comprehensive comparative genomics study  
763 conducted by Xu *et al.*, 2016 (7) revealed that horizontal gene transfer events resulting in the  
764 acquisition of novel genes in *Leptospira* are fairly common.

765 Overall, this study provides evidence for the existence of divergent lineages of soil  
766 dwelling pathogenic *Leptospira* spp. in Puerto Rico; the disease potential of these novel types in  
767 humans and animals is unknown. The genetic diversity within this genus found in the  
768 environment in Puerto Rico is vast and, thus, there is a need to characterize this diversity to  
769 account for it in the diagnosis of leptospirosis. Many cases of leptospirosis are thought to go  
770 undetected, or are misdiagnosed as other febrile illnesses, and it is possible that these novel  
771 types play a role in such cases. A follow up study in Puerto Rico to investigate the possibility  
772 that these novel types are found in human and animal samples would be highly valuable.  
773 Furthermore, environmental surveys aimed at the discovery of these novel types in all areas  
774 where leptospirosis is a public health concern will be of critical importance towards improving  
775 diagnostics and public health outcomes.

## 776 **Acknowledgements**

777 We thank Ryelan McDonough and Amber Jones for laboratory assistance preparing  
778 samples for whole genome sequencing and Karen LeCount for performing MAT. USDA is an  
779 equal opportunity provider and employer. Mention of trade names or commercial products in  
780 this publication is solely for the purpose of providing specific information and does not imply  
781 recommendation or endorsement by the U.S. Department of Agriculture or the Centers for  
782 Disease Control and Prevention. This work was funded in part by the United States Department  
783 of Health and Human Services Centers for Disease Control and Prevention (Award#  
784 6NU1ROT000006-01-04). The Brazilian agency FAPESP also financially supported this work;  
785 LGVF is funded with a fellowship from FAPESP (2017/06731-8 and 2019/20302-8).

## 786 References

- 787 1. Vincent AT, Schiettekatte O, Goarant C, Neela VK, Bernet E, Thibeaux R, et al. Revisiting the  
788 taxonomy and evolution of pathogenicity of the genus *Leptospira* through the prism of genomics. *PLoS*  
789 *Negl Trop Dis*. 2019;13(5):e0007270.
- 790 2. Levett PN. Leptospirosis. *Clin Microbiol Rev*. 2001;14(2):296-326.
- 791 3. Adler B, de la Pena Moctezuma A. *Leptospira* and leptospirosis. *Vet Microbiol*. 2010;140(3-  
792 4):287-96.
- 793 4. Stoddard RA, Gee JE, Wilkins PP, McCaustland K, Hoffmaster AR. Detection of pathogenic  
794 *Leptospira* spp. through TaqMan polymerase chain reaction targeting the LipL32 gene. *Diagn Microbiol*  
795 *Infect Dis*. 2009;64(3):247-55.
- 796 5. Ko AI, Goarant C, Picardeau M. *Leptospira*: the dawn of the molecular genetics era for an  
797 emerging zoonotic pathogen. *Nat Rev Microbiol*. 2009;7(10):736-47.
- 798 6. Picardeau M, Bulach DM, Bouchier C, Zuerner RL, Zidane N, Wilson PJ, et al. Genome sequence  
799 of the saprophyte *Leptospira biflexa* provides insights into the evolution of *Leptospira* and the  
800 pathogenesis of leptospirosis. *PLoS One*. 2008;3(2):e1607.
- 801 7. Xu Y, Zhu Y, Wang Y, Chang YF, Zhang Y, Jiang X, et al. Whole genome sequencing revealed host  
802 adaptation-focused genomic plasticity of pathogenic *Leptospira*. *Sci Rep*. 2016;6:20020.
- 803 8. Bharti AR, Nally JE, Ricaldi JN, Matthias MA, Diaz MM, Lovett MA, et al. Leptospirosis: a zoonotic  
804 disease of global importance. *Lancet Infect Dis*. 2003;3(12):757-71.
- 805 9. Picardeau M. Diagnosis and epidemiology of leptospirosis. *Med Mal Infect*. 2013;43(1):1-9.
- 806 10. Putz EJ, Nally JE. Investigating the Immunological and Biological Equilibrium of Reservoir Hosts  
807 and Pathogenic *Leptospira*: Balancing the Solution to an Acute Problem? *Front Microbiol*. 2020;11:2005.
- 808 11. Monahan AM, Callanan JJ, Nally JE. Proteomic analysis of *Leptospira interrogans* shed in urine of  
809 chronically infected hosts. *Infect Immun*. 2008;76(11):4952-8.
- 810 12. Haake DA, Levett PN. Leptospirosis in humans. *Curr Top Microbiol Immunol*. 2015;387:65-97.

- 811 13. Leonard FC, Quinn PJ, Ellis WA, O'Farrell K. Duration of urinary excretion of leptospires by cattle  
812 naturally or experimentally infected with *Leptospira interrogans* serovar hardjo. Vet Rec.  
813 1992;131(19):435-9.
- 814 14. Rocha BR, Narduche L, Oliveira CS, Martins G, Lilenbaum W. Molecular demonstration of  
815 intermittent shedding of *Leptospira* in cattle and sheep and its implications on control. Cienc Rural.  
816 2017;47(8).
- 817 15. Costa F, Hagan JE, Calcagno J, Kane M, Torgerson P, Martinez-Silveira MS, et al. Global Morbidity  
818 and Mortality of Leptospirosis: A Systematic Review. PLoS Negl Trop Dis. 2015;9(9):e0003898.
- 819 16. Goarant C. Leptospirosis: risk factors and management challenges in developing countries. Res  
820 Rep Trop Med. 2016;7:49-62.
- 821 17. Marinova-Petkova A, Guendel I, Strysko JP, Ekpo LL, Galloway R, Yoder J, et al. First Reported  
822 Human Cases of Leptospirosis in the United States Virgin Islands in the Aftermath of Hurricanes Irma and  
823 Maria, September-November 2017. Open Forum Infect Dis. 2019;6(7):ofz261.
- 824 18. Ramos LJS, Lazaro PM, Barbosa JS, Cardona CP. Spatial and Epidemiological Analysis of Human  
825 Leptospirosis in Puerto Rico, 1996 to 2014. Geofocus-Rev Int Cie. 2018(21):227-51.
- 826 19. Peters A, Vokaty A, Portch R, Gebre Y. Leptospirosis in the Caribbean: a literature review. Rev  
827 Panam Salud Publica. 2017;41:e166.
- 828 20. Mwachui MA, Crump L, Hartskeerl R, Zinsstag J, Hattendorf J. Environmental and Behavioural  
829 Determinants of Leptospirosis Transmission: A Systematic Review. PLoS Negl Trop Dis.  
830 2015;9(9):e0003843.
- 831 21. Herrmann-Storck C, Brioudes A, Quirin R, Deloumeaux J, Lamaury I, Nicolas M, et al.  
832 Retrospective review of leptospirosis in Guadeloupe, French West Indies 1994-2001. West Indian Med J.  
833 2005;54(1):42-6.
- 834 22. Pappachan MJ, Mathew S, Aravindan KP, Khader A, Bharghavan PV, Kareem MM, et al. Risk  
835 factors for mortality in patients with leptospirosis during an epidemic in northern Kerala. Natl Med J  
836 India. 2004;17(5):240-2.
- 837 23. Epstein PR. Climate change and human health. N Engl J Med. 2005;353(14):1433-6.
- 838 24. Sanders EJ, Rigau-Perez JG, Smits HL, Deseda CC, Vorndam VA, Aye T, et al. Increase of  
839 leptospirosis in dengue-negative patients after a hurricane in Puerto Rico in 1996 [correction of 1966].  
840 Am J Trop Med Hyg. 1999;61(3):399-404.
- 841 25. Concepcion-Acevedo J, Patel A, Luna-Pinto C, Pena RG, Cuevas Ruiz RI, Arbolay HR, et al. Initial  
842 Public Health Laboratory Response After Hurricane Maria - Puerto Rico, 2017. MMWR Morb Mortal  
843 Wkly Rep. 2018;67(11):333-6.
- 844 26. Nedelman M. Suspected leptospirosis cases increasing in Puerto Rico after hurricane Maria.  
845 <https://www.cnn.com/2017/10/24/health/leptospirosis-puerto-rico/index.html>. 2017.
- 846 27. Casanovas-Massana A, Pedra GG, Wunder EA, Jr., Diggle PJ, Begon M, Ko AI. Quantification of  
847 *Leptospira interrogans* Survival in Soil and Water Microcosms. Appl Environ Microbiol. 2018;84(13).
- 848 28. Bierque E, Thibeaux R, Girault D, Soupe-Gilbert ME, Goarant C. A systematic review of  
849 *Leptospira* in water and soil environments. PLoS One. 2020;15(1):e0227055.
- 850 29. Tarantola A, Goarant C. Leptospirosis in French Historical Medical Literature: Weil's Disease or  
851 Kelsch's Disease? Am J Trop Med Hyg. 2018;99(6):1366-8.
- 852 30. Miller E, Barragan V, Chiriboga J, Weddell C, Luna L, Jimenez DJ, et al. *Leptospira* in river and soil  
853 in a highly endemic area of Ecuador. BMC Microbiol. 2021;21(1):17.
- 854 31. Munoz-Zanzi C, Mason MR, Encina C, Astroza A, Romero A. *Leptospira* contamination in  
855 household and environmental water in rural communities in southern Chile. Int J Environ Res Public  
856 Health. 2014;11(7):6666-80.

- 857 32. Flores B, Escobar K, Muzquiz JL, Sheleby-Elias J, Mora B, Roque E, et al. Detection of Pathogenic  
858 Leptospire in Water and Soil in Areas Endemic to Leptospirosis in Nicaragua. *Trop Med Infect Dis.*  
859 2020;5(3).
- 860 33. Barragan V, Olivas S, Keim P, Pearson T. Critical Knowledge Gaps in Our Understanding of  
861 Environmental Cycling and Transmission of *Leptospira* spp. *Appl Environ Microbiol.* 2017;83(19).
- 862 34. Hall CM, Jaramillo S, Jimenez R, Stone NE, Centner H, Busch JD, et al. *Burkholderia pseudomallei*,  
863 the causative agent of melioidosis, is rare but ecologically established and widely dispersed in the  
864 environment in Puerto Rico. *PLoS Negl Trop Dis.* 2019;13(9):e0007727.
- 865 35. Stone NE, Sidak-Loftis LC, Sahl JW, Vazquez AJ, Wiggins KB, Gillece JD, et al. More than 50% of  
866 *Clostridium difficile* Isolates from Pet Dogs in Flagstaff, USA, Carry Toxigenic Genotypes. *PloS one.*  
867 2016;11(10):e0164504.
- 868 36. Ahmed A, Engelberts MF, Boer KR, Ahmed N, Hartskeerl RA. Development and validation of a  
869 real-time PCR for detection of pathogenic *Leptospira* species in clinical materials. *PLoS One.*  
870 2009;4(9):e7093.
- 871 37. Ahmed N, Devi SM, Valverde Mde L, Vijayachari P, Machang'u RS, Ellis WA, et al. Multilocus  
872 sequence typing method for identification and genotypic classification of pathogenic *Leptospira* species.  
873 *Ann Clin Microbiol Antimicrob.* 2006;5:28.
- 874 38. Hall TA. BioEdit: a user-friendly biological sequence alignment editor and analysis program for  
875 Windows 95/98/NT. *Nucleic Acids Symposium Series.* 1999(41):95-8.
- 876 39. Colman RE, Schupp JM, Hicks ND, Smith DE, Buchhagen JL, Valafar F, et al. Detection of Low-  
877 Level Mixed-Population Drug Resistance in *Mycobacterium tuberculosis* Using High Fidelity Amplicon  
878 Sequencing. *Plos One.* 2015;10(5).
- 879 40. Bolyen E, Rideout JR, Dillon MR, Bokulich NA, Abnet CC, Al-Ghalith GA, et al. Reproducible,  
880 interactive, scalable and extensible microbiome data science using QIIME 2. *Nat Biotechnol.*  
881 2019;37(8):852-7.
- 882 41. M. M. Cutadapt Removes Adapter Sequences From High-Throughput Sequencing Reads.  
883 *EMBNetjournal.* 2011;17(1):10-2.
- 884 42. Callahan BJ, McMurdie PJ, Rosen MJ, Han AW, Johnson AJ, Holmes SP. DADA2: High-resolution  
885 sample inference from Illumina amplicon data. *Nat Methods.* 2016;13(7):581-3.
- 886 43. Altschul SF, Gish W, Miller W, Myers EW, Lipman DJ. Basic local alignment search tool. *J Mol*  
887 *Biol.* 1990;215(3):403-10.
- 888 44. Camacho C, Coulouris G, Avagyan V, Ma N, Papadopoulos J, Bealer K, et al. BLAST+: architecture  
889 and applications. *BMC Bioinformatics.* 2009;10:421.
- 890 45. Edgar RC. MUSCLE: multiple sequence alignment with high accuracy and high throughput.  
891 *Nucleic Acids Res.* 2004;32(5):1792-7.
- 892 46. Tamura K, Stecher G, Peterson D, Filipski A, Kumar S. MEGA6: Molecular Evolutionary Genetics  
893 Analysis version 6.0. *Molecular biology and evolution.* 2007;30(12):2725-9.
- 894 47. Altschul SF, Madden TL, Schaffer AA, Zhang J, Zhang Z, Miller W, et al. Gapped BLAST and PSI-  
895 BLAST: a new generation of protein database search programs. *Nucleic Acids Res.* 1997;25(17):3389-  
896 402.
- 897 48. Nguyen LT, Schmidt HA, von Haeseler A, Minh BQ. IQ-TREE: a fast and effective stochastic  
898 algorithm for estimating maximum-likelihood phylogenies. *Molecular biology and evolution.*  
899 2015;32(1):268-74.
- 900 49. Kalyaanamoorthy S, Minh BQ, Wong TKF, von Haeseler A, Jermiin LS. ModelFinder: fast model  
901 selection for accurate phylogenetic estimates. *Nat Methods.* 2017;14(6):587-9.
- 902 50. Hoang DT, Chernomor O, von Haeseler A, Minh BQ, Vinh LS. UFBoot2: Improving the Ultrafast  
903 Bootstrap Approximation. *Molecular biology and evolution.* 2018;35(2):518-22.



- 904 51. Guindon S, Dufayard JF, Lefort V, Anisimova M, Hordijk W, Gascuel O. New algorithms and  
905 methods to estimate maximum-likelihood phylogenies: assessing the performance of PhyML 3.0. *Syst*  
906 *Biol.* 2010;59(3):307-21.
- 907 52. Team R. RStudio: Integrated Development for R. PBC, Boston, MA: RStudio; 2020.
- 908 53. Hornsby RL, Alt DP, Nally JE. Isolation and propagation of leptospire at 37 degrees C directly  
909 from the mammalian host. *Sci Rep-Uk.* 2020;10(1).
- 910 54. Chakraborty A, Miyahara S, Villanueva SY, Saito M, Gloriani NG, Yoshida S. A novel combination  
911 of selective agents for isolation of *Leptospira* species. *Microbiol Immunol.* 2011;55(7):494-501.
- 912 55. Zuerner RL. Laboratory maintenance of pathogenic *Leptospira*. *Curr Protoc Microbiol.*  
913 2005;Chapter 12:Unit 12E 1.
- 914 56. Fernandes LGV, Hornsby RL, Nascimento A, Nally JE. Genetic manipulation of pathogenic  
915 *Leptospira*: CRISPR interference (CRISPRi)-mediated gene silencing and rapid mutant recovery at 37  
916 degrees C. *Sci Rep.* 2021;11(1):1768.
- 917 57. Kozarewa I, Turner DJ. 96-plex molecular barcoding for the Illumina Genome Analyzer. *Methods*  
918 *Mol Biol.* 2011;733:279-98.
- 919 58. Benson DA, Karsch-Mizrachi I, Clark K, Lipman DJ, Ostell J, Sayers EW. GenBank. *Nucleic Acids*  
920 *Res.* 2012;40(Database issue):D48-53.
- 921 59. Bankevich A, Nurk S, Antipov D, Gurevich AA, Dvorkin M, Kulikov AS, et al. SPAdes: a new  
922 genome assembly algorithm and its applications to single-cell sequencing. *J Comput Biol.*  
923 2012;19(5):455-77.
- 924 60. Li H. Minimap2: pairwise alignment for nucleotide sequences. *Bioinformatics.* 2018;34(18):3094-  
925 100.
- 926 61. Li H, Handsaker B, Wysoker A, Fennell T, Ruan J, Homer N, et al. The Sequence Alignment/Map  
927 format and SAMtools. *Bioinformatics.* 2009;25(16):2078-9.
- 928 62. Ondov BD, Treangen TJ, Melsted P, Mallonee AB, Bergman NH, Koren S, et al. Mash: fast  
929 genome and metagenome distance estimation using MinHash. *Genome Biol.* 2016;17(1):132.
- 930 63. Virtanen P, Gommers R, Oliphant TE, Haberland M, Reddy T, Cournapeau D, et al. SciPy 1.0:  
931 fundamental algorithms for scientific computing in Python. *Nat Methods.* 2020;17(3):261-72.
- 932 64. Pritchard L, Glover RH, Humphris S, Elphinstone JG, Toth IK. Genomics and taxonomy in  
933 diagnostics for food security: soft-rotting enterobacterial plant pathogens. *Anal Methods-Uk.*  
934 2016;8(1):12-24.
- 935 65. Seemann T. Prokka: rapid prokaryotic genome annotation. *Bioinformatics.* 2014;30(14):2068-9.
- 936 66. Delcher AL, Phillippy A, Carlton J, Salzberg SL. Fast algorithms for large-scale genome alignment  
937 and comparison. *Nucleic Acids Res.* 2002;30(11):2478-83.
- 938 67. Sahl JW, Lemmer D, Travis J, Schupp JM, Gillece JD, Aziz M, et al. NASP: an accurate, rapid  
939 method for the identification of SNPs in WGS datasets that supports flexible input and output formats.  
940 *Microb Genom.* 2016;2(8):e000074.
- 941 68. Minh BQ, Schmidt HA, Chernomor O, Schrempf D, Woodhams MD, von Haeseler A, et al. IQ-  
942 TREE 2: New Models and Efficient Methods for Phylogenetic Inference in the Genomic Era. *Molecular*  
943 *biology and evolution.* 2020;37(5):1530-4.
- 944 69. Nally JE, Hornsby RL, Alt DP, Bayles D, Wilson-Welder JH, Palmquist DE, et al. Isolation and  
945 characterization of pathogenic leptospire associated with cattle. *Vet Microbiol.* 2018;218:25-30.
- 946 70. Cole JR, Jr., Sulzer CR, Pursell AR. Improved microtechnique for the leptospiral microscopic  
947 agglutination test. *Appl Microbiol.* 1973;25(6):976-80.
- 948 71. Ellis WA, Montgomery J, Cassells JA. Dihydrostreptomycin treatment of bovine carriers of  
949 *Leptospira interrogans* serovar hardjo. *Res Vet Sci.* 1985;39(3):292-5.
- 950 72. Picaudeau M. Virulence of the zoonotic agent of leptospirosis: still terra incognita? *Nat Rev*  
951 *Microbiol.* 2017;15(5):297-307.

- 952 73. Baker GC, Smith JJ, Cowan DA. Review and re-analysis of domain-specific 16S primers. J  
953 Microbiol Methods. 2003;55(3):541-55.
- 954 74. Thibeaux R, Soupe-Gilbert ME, Kainiu M, Girault D, Bierque E, Fernandes J, et al. The zoonotic  
955 pathogen *Leptospira interrogans* mitigates environmental stress through cyclic-di-GMP-controlled  
956 biofilm production. NPJ Biofilms Microbiomes. 2020;6(1):24.
- 957 75. Ristow P, Bourhy P, Kerneis S, Schmitt C, Prevost MC, Lilenbaum W, et al. Biofilm formation by  
958 saprophytic and pathogenic leptospires. Microbiol-Sgm. 2008;154:1309-17.
- 959 76. Briskin EA, Casanovas-Massana A, Ryff KR, Morales-Estrada S, Hamond C, Perez-Rodriguez NM,  
960 et al. Seroprevalence, Risk Factors, and Rodent Reservoirs of Leptospirosis in an Urban Community of  
961 Puerto Rico, 2015. J Infect Dis. 2019;220(9):1489-97.
- 962 77. Izurieta R, Galwankar S, Clem A. Leptospirosis: The "mysterious" mimic. J Emerg Trauma Shock.  
963 2008;1(1):21-33.
- 964 78. Musso D, La Scola B. Laboratory diagnosis of leptospirosis: a challenge. J Microbiol Immunol  
965 Infect. 2013;46(4):245-52.
- 966 79. Zuerner RL, Alt DP, Palmer MV. Development of chronic and acute golden Syrian hamster  
967 infection models with *Leptospira borgpetersenii* serovar Hardjo. Vet Pathol. 2012;49(2):403-11.
- 968 80. Cordonin C, Turpin M, Bascands JL, Dellagi K, Mavingui P, Tortosa P, et al. Three *Leptospira*  
969 Strains From Western Indian Ocean Wildlife Show Highly Distinct Virulence Phenotypes Through  
970 Hamster Experimental Infection. Frontiers in Microbiology. 2019;10.
- 971 81. Thaipadungpanit J, Wuthiekanun V, Chierakul W, Smythe LD, Petkanchanapong W, Limpaboon  
972 R, et al. A dominant clone of *Leptospira interrogans* associated with an outbreak of human leptospirosis  
973 in Thailand. PLoS Negl Trop Dis. 2007;1(1):e56.
- 974

975 **Figures**

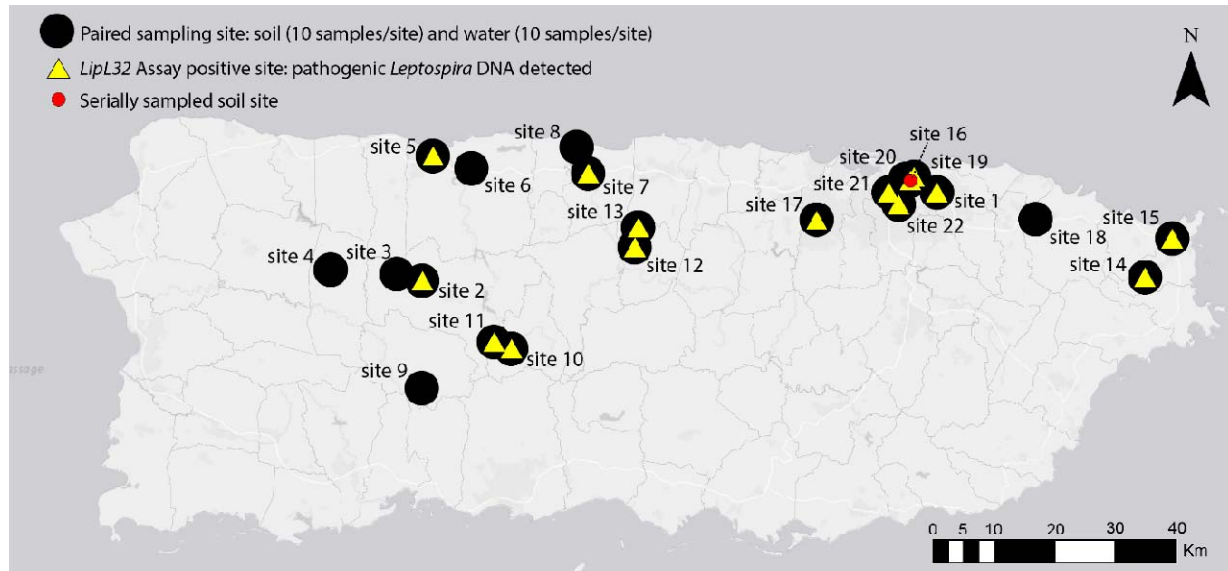

976

977 **Figure 1: Map of Puerto Rico indicating sites where environmental samples were collected for**  
978 **the detection of pathogenic *Leptospira* spp. DNA from 2018-2020. Black dots represent paired**  
979 **water and soil sites (n=22); 20 samples were collected from each site (10 soil and 10 water).**  
980 **Yellow triangles indicate sites where pathogenic *Leptospira* DNA was detected (15/22 sites).**  
981 **One site in San Juan (site 16, red circle) was serially sampled three times over a 14-month**  
982 **period to assess persistence of pathogenic *Leptospira* in soil.**

A

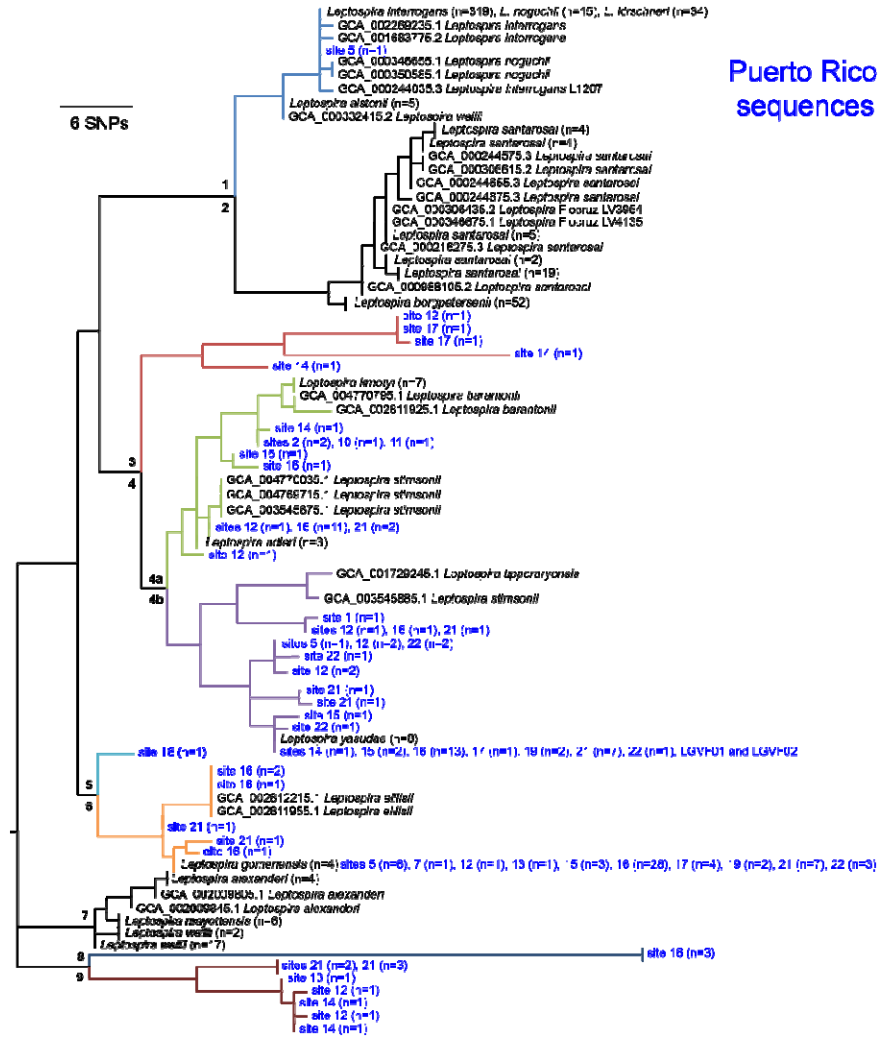

B

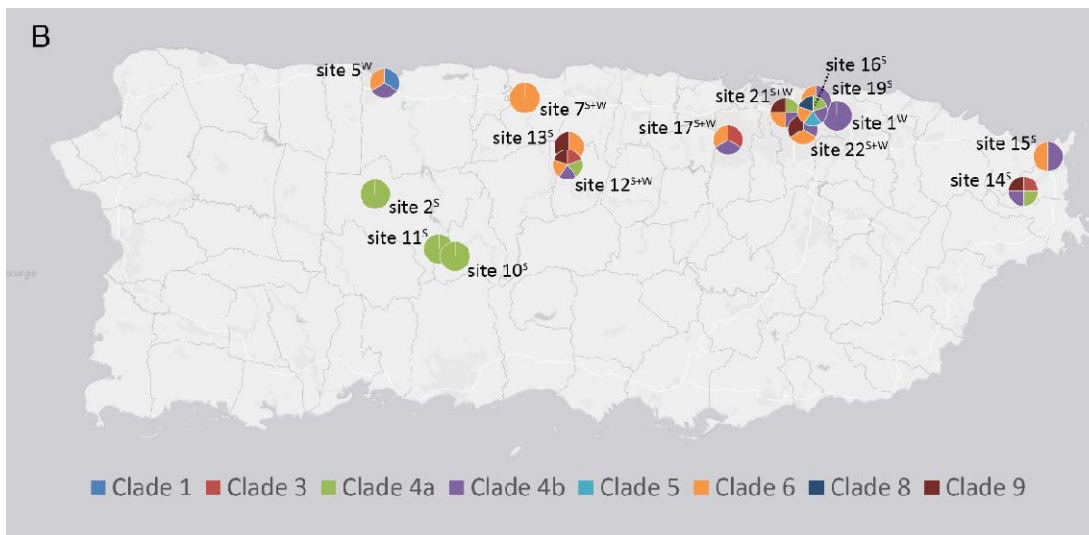

984 **Figure 2: Genetically diverse and previously undescribed lineages of pathogenic *Leptospira***  
985 **are widespread in Puerto Rico.** A) Maximum likelihood phylogeny constructed using a 202bp  
986 segment of the *lipL32* gene, including sequences obtained from soil and water samples  
987 collected in this study (blue text) and those available in public databases (black text). Nine  
988 major genetic clades are represented, seven of which were present in Puerto Rico, including  
989 four not previously described. Clades are labelled 1 through 9 on the tree and color coded. B)  
990 Sites where each major clade was collected, with colors within the pie charts corresponding to  
991 those in the phylogeny; superscript indicates if soil (S) and/or water (W) samples were positive  
992 at each site. Fifteen positive sites are included on this map.



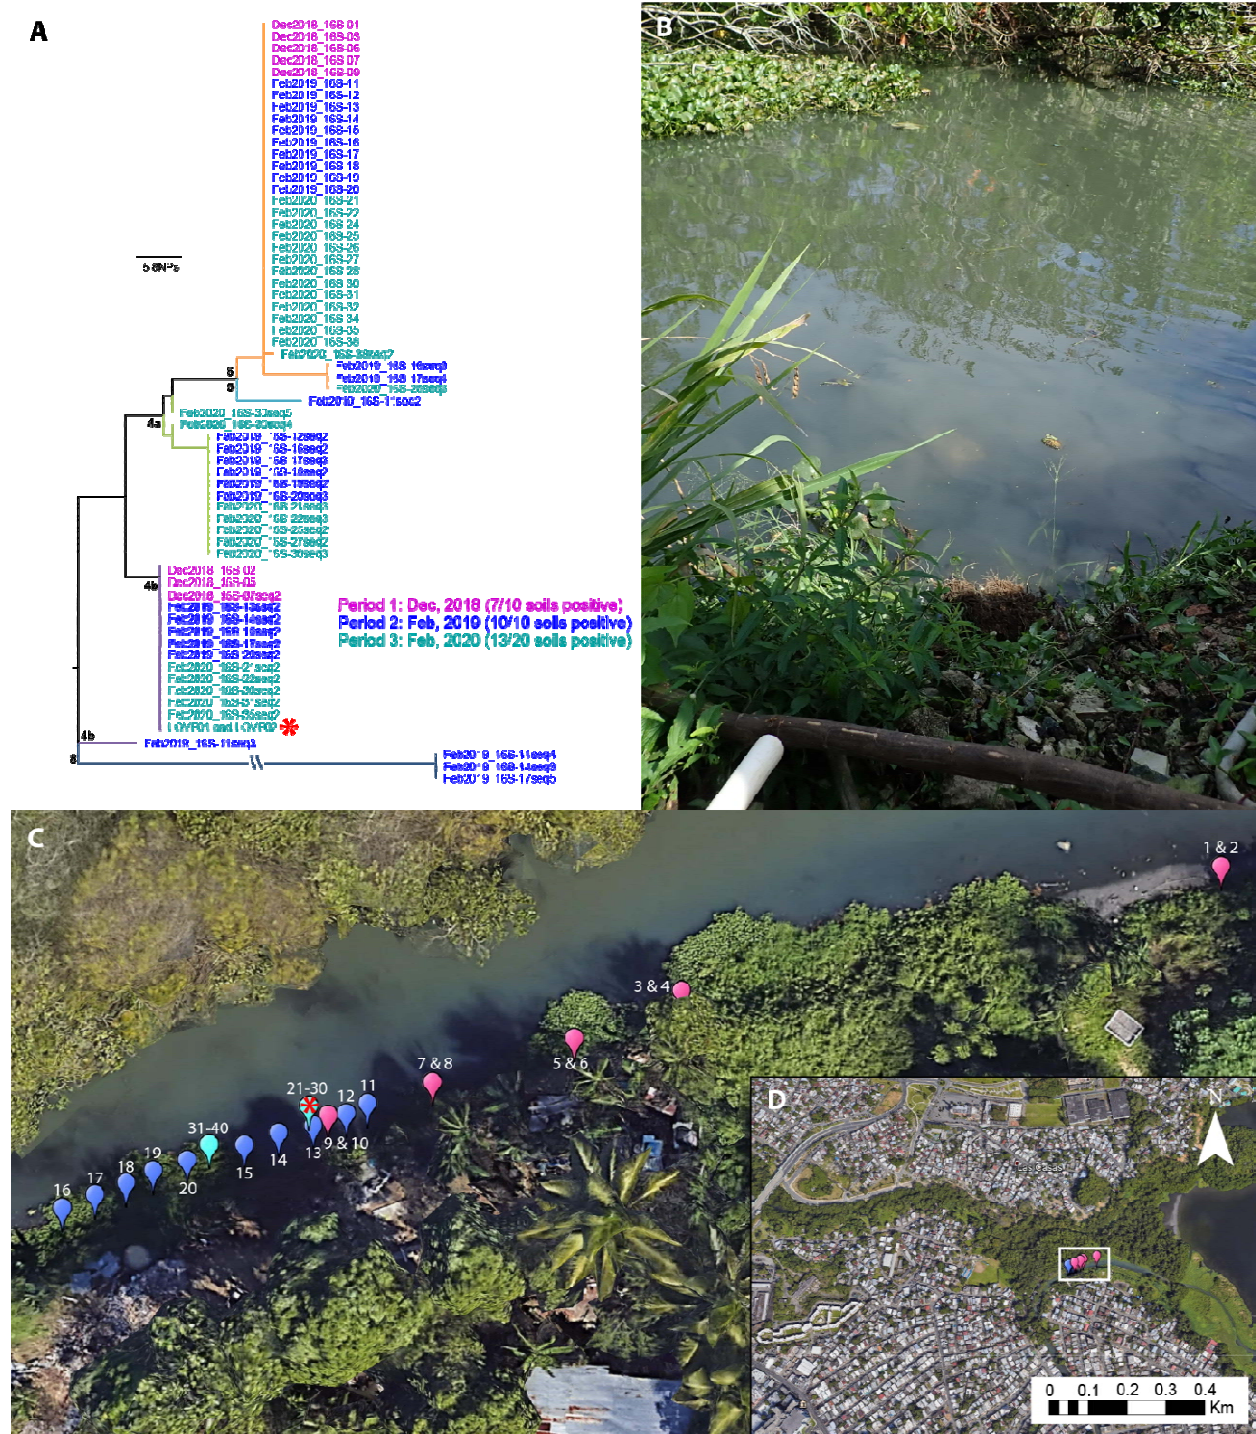

993  
 994 **Figure 3: Site 16 in Caño Martín Peña, San Juan, Puerto Rico where sampling was conducted**  
 995 **at three separate timepoints to assess environmental persistence of pathogenic *Leptospira* in**  
 996 **soil near the edge of the water. A) Maximum likelihood phylogeny of all *lipL32* sequences**

997 obtained from this soil site over the course of three sampling periods (color coded by date of  
998 sampling period); two of five clades detected at this site were identified at all three timepoints,  
999 suggesting environmental persistence. Clade colors correspond to Figure 2. Two isolates  
1000 representing a novel pathogenic *Leptospira* species were obtained from soil sample 27 (red  
1001 asterisk). B) Photo of exact location where samples 21-30 were collected and the isolates were  
1002 obtained. C) Transect where 40 soil samples were collected over three sampling periods.  
1003 Balloons are color coded to indicate sampling period as in the phylogeny (panel A) and the red  
1004 asterisk denotes the location where the *Leptospira* isolates originated. D) Location of site 16 in  
1005 Caño Martín Peña.  
1006

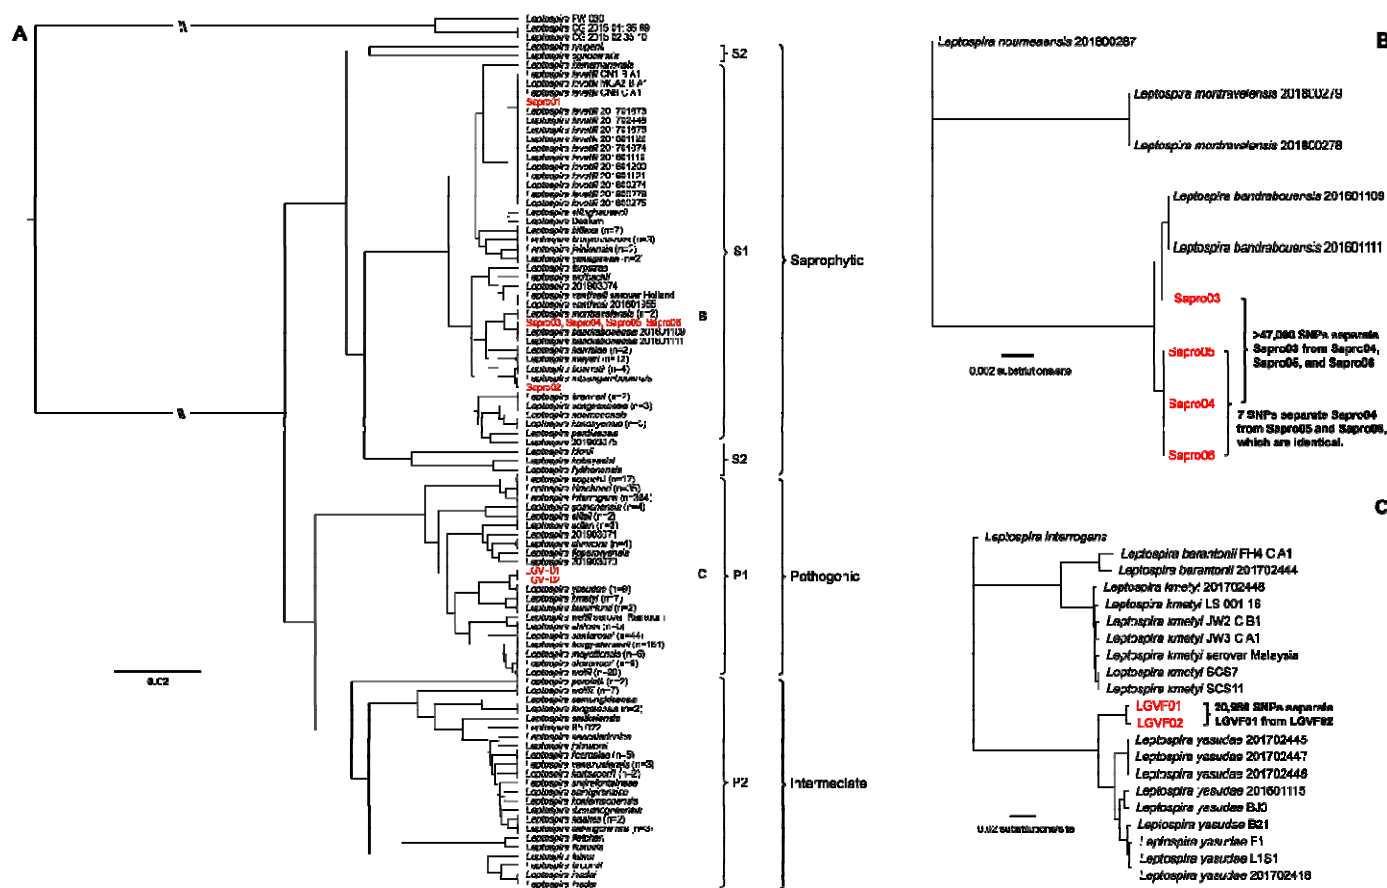

1007

1008 **Figure 4: Whole genome dendrogram of 802 known pathogenic, intermediate, and**  
 1009 **saprophytic *Leptospira* spp. isolates, including six saprophytic and two pathogenic isolates**

1010 **obtained in this study from a single soil sample from site 16. A) Pairwise genomic distance**

1011 **dendrogram contextualizing the relationship among all known saprophytic (S1 and S2),**

1012 **intermediate (P2), and pathogenic (P1) *Leptospira* spp. reveals that the pathogenic isolates**

1013 **LGVF01 and LGVF02 represent two genotypes of the same previously undescribed pathogenic**

1014 **species, whereas the saprophytes belong to three known *Leptospira* spp. B) Detailed view of**

1015 **the S1 clade that contains four saprophytic isolates obtained during this study. This maximum**

1016 **likelihood phylogeny reveals significant diversity among isolates that fall within the *L.***

1017 ***bandrabouensis* clade. C) Detailed view of the P1 clade that contains two pathogenic isolates**



1018 obtained during this study. This maximum likelihood phylogeny reveals two genotypes of a  
1019 novel pathogenic *Leptospira* spp. isolated from soil in Puerto Rico.

1020 **Supporting information**

✦ Soil Sample

✦ Water Sample

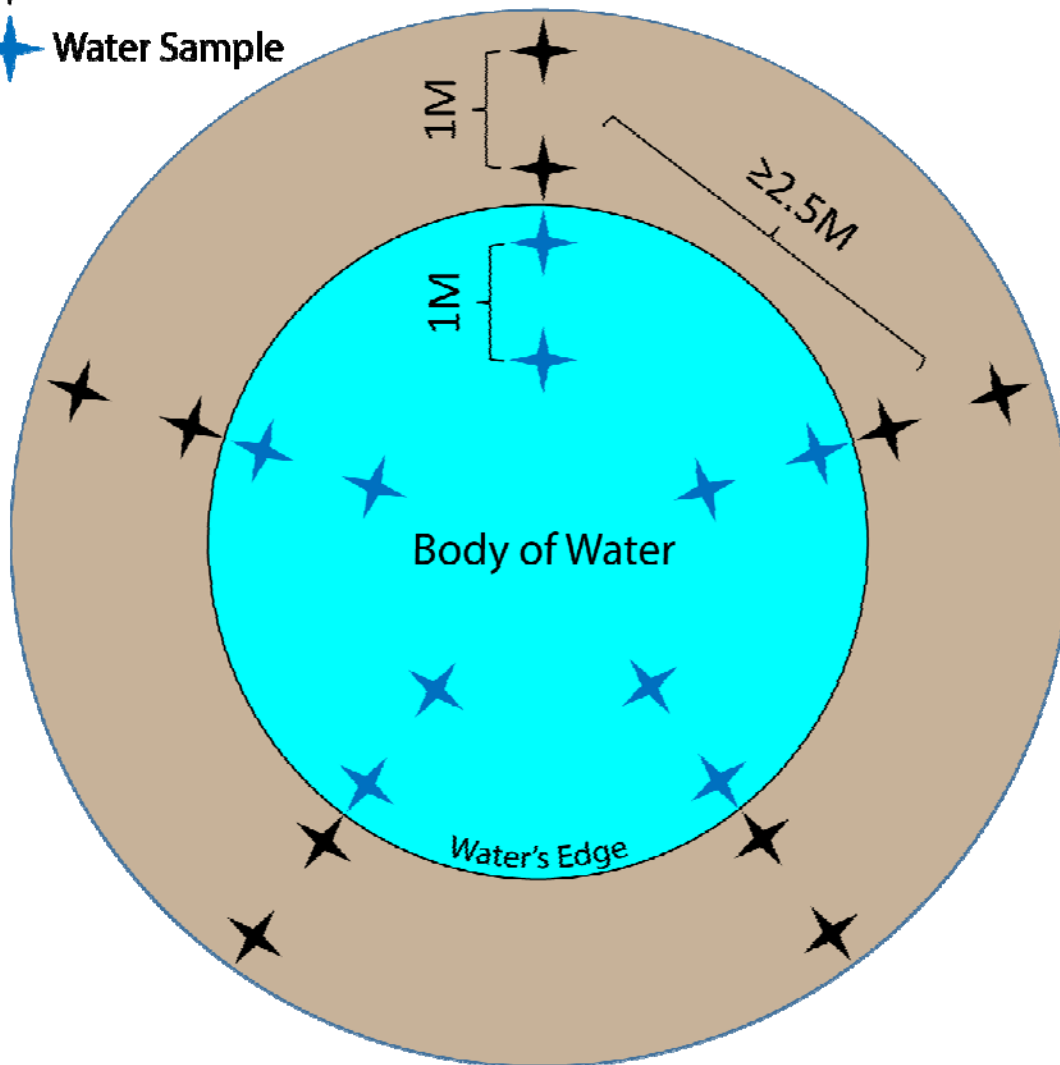

1021

1022 **Figure S1: Sampling design for paired soil and water sites. At each site, five transects were**

1023 **sampled (two soil and two water samples per transect) for a total of 20 samples per site.**

1024 Black and blue stars represent soil and water samples, respectively. Transects were a minimum

1025 of 2.5 meters apart. This sampling design was also applied in a linear fashion for the sampling of

1026 rivers and streams.

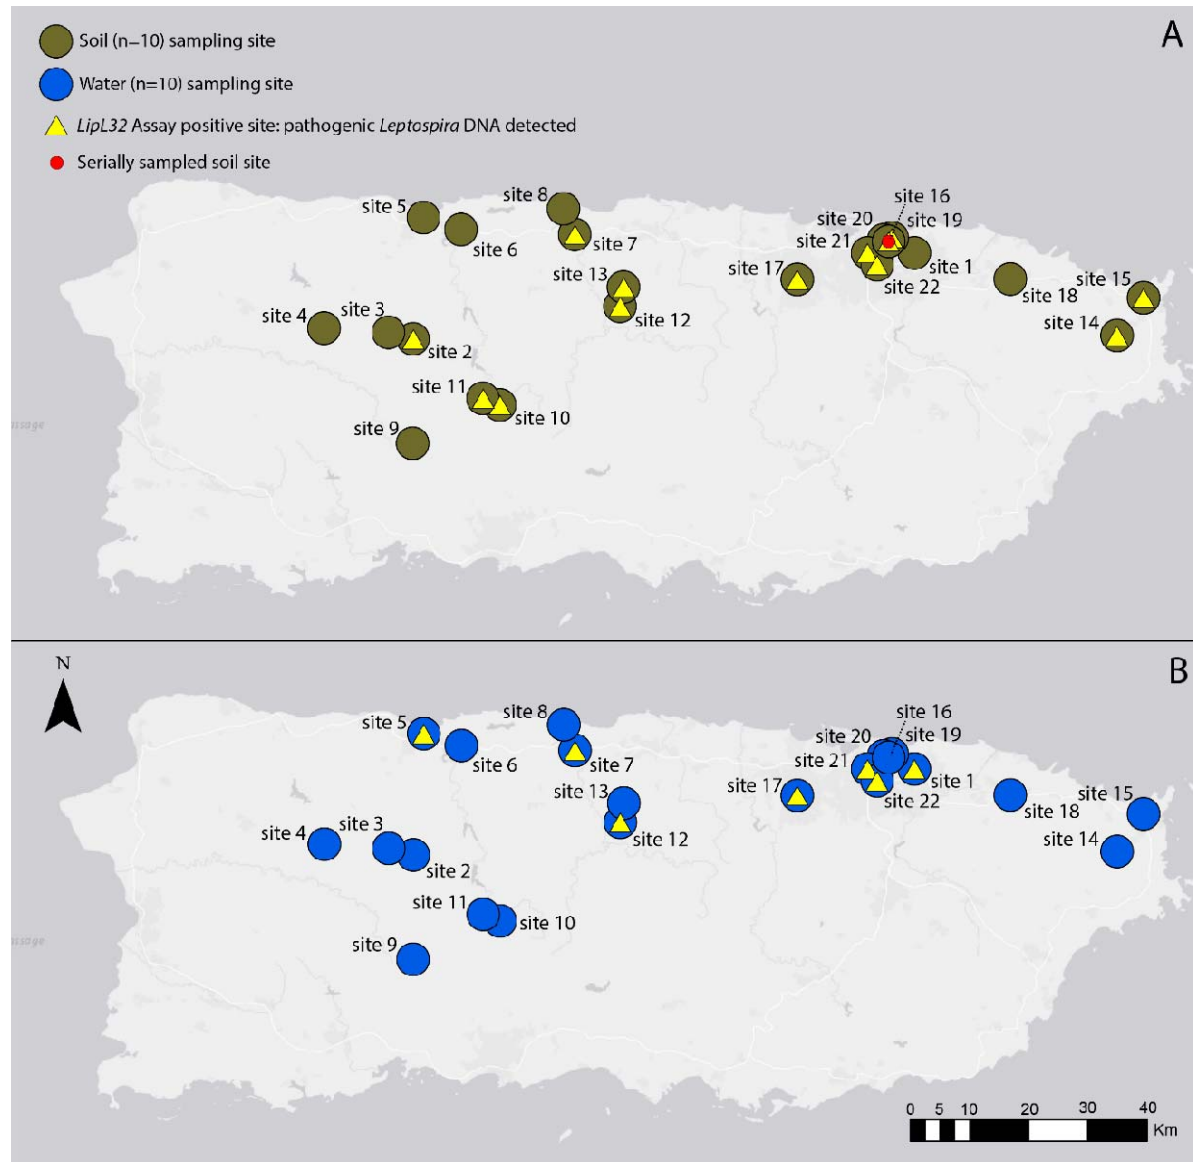

1027

1028 **Figure S2: Map of Puerto Rico indicating where soil (panel A) and water (panel B) samples**

1029 **were collected for the detection of pathogenic *Leptospira* spp. (2018-2020).** The yellow

1030 triangles indicate sites where pathogenic *Leptospira* DNA was detected. Eight soil sites were

1031 positive for pathogenic *Leptospira* DNA, compared to two water sites; both soil and water were

1032 positive at five sites. Site 16, which was used to assess environmental persistence in soil is

1033 indicated with a red circle.

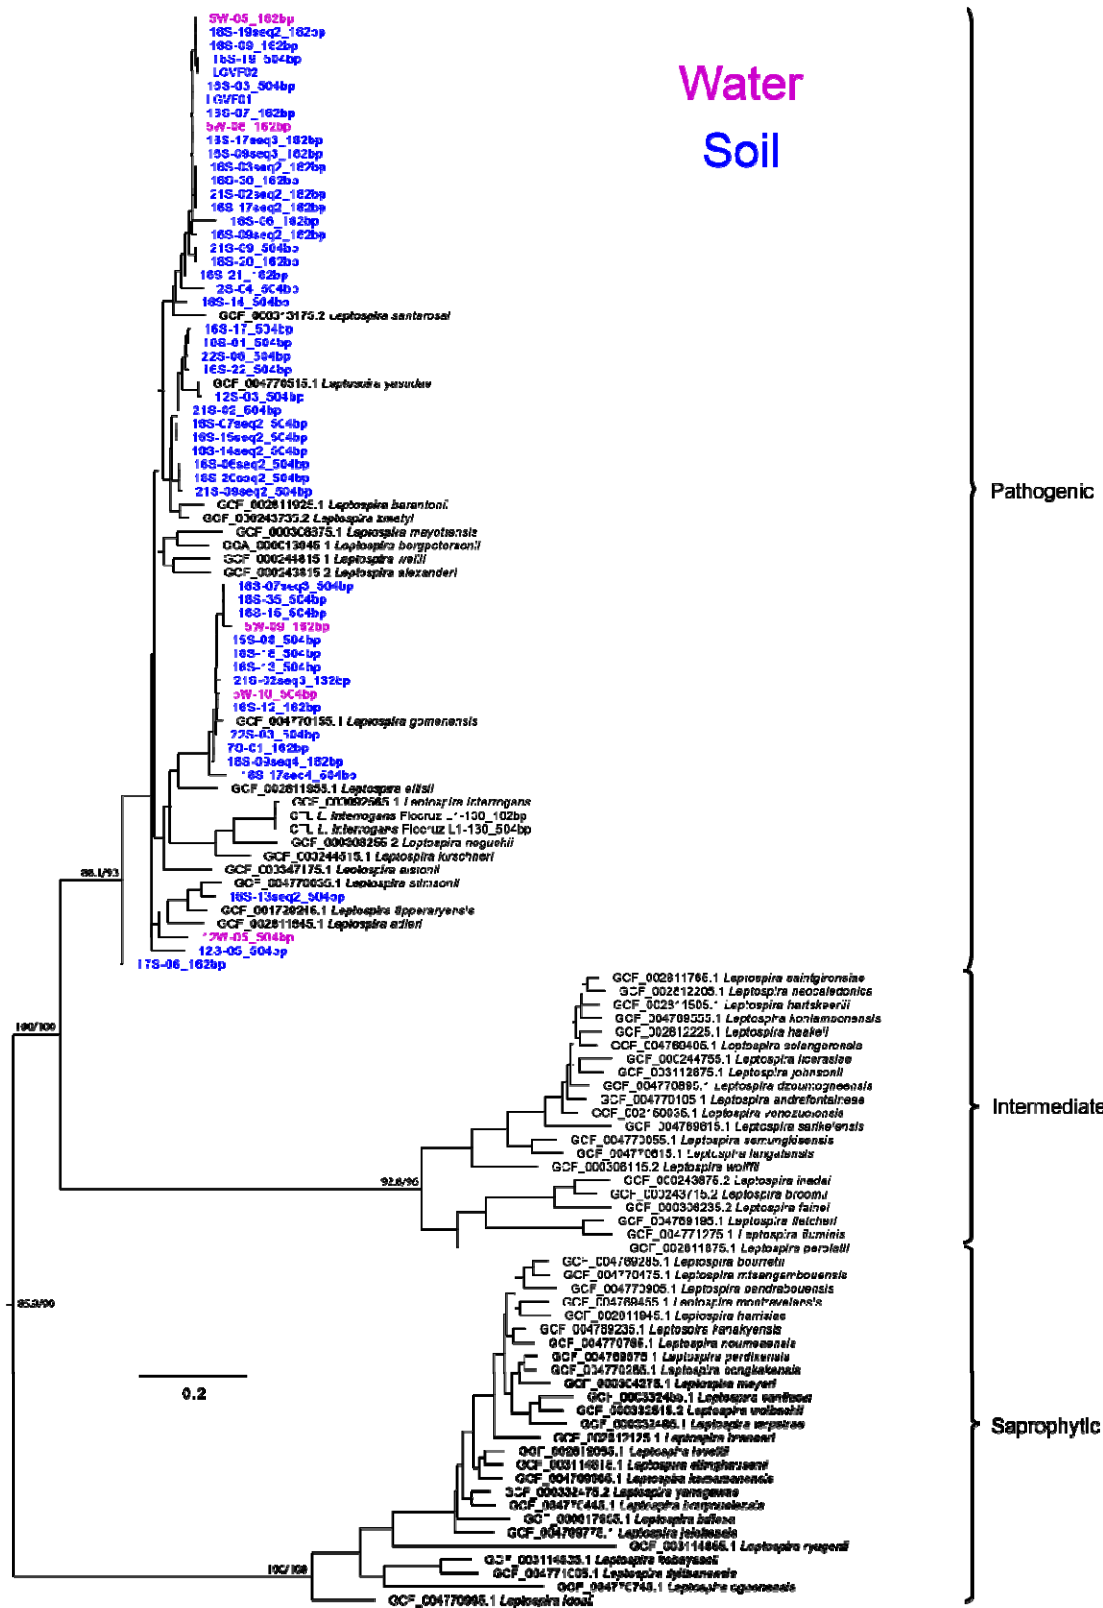

1035 **Figure S3: Maximum likelihood phylogeny of the *secY* gene reveals that pathogenic *Leptospira***  
1036 **was identified in Puerto Rico soil and water and provides support for the phylogenetic**  
1037 **relationships observed with *lipL32* sequences.** Sequences generated from soil and water  
1038 samples collected in Puerto Rico are in blue or pink text, the novel pathogenic Puerto Rico  
1039 isolates from soil are also included; reference sequences for pathogenic, intermediate, and  
1040 saprophytic *Leptospira* are in black. Bootstrap/aLRT support values are indicated on branch  
1041 nodes.

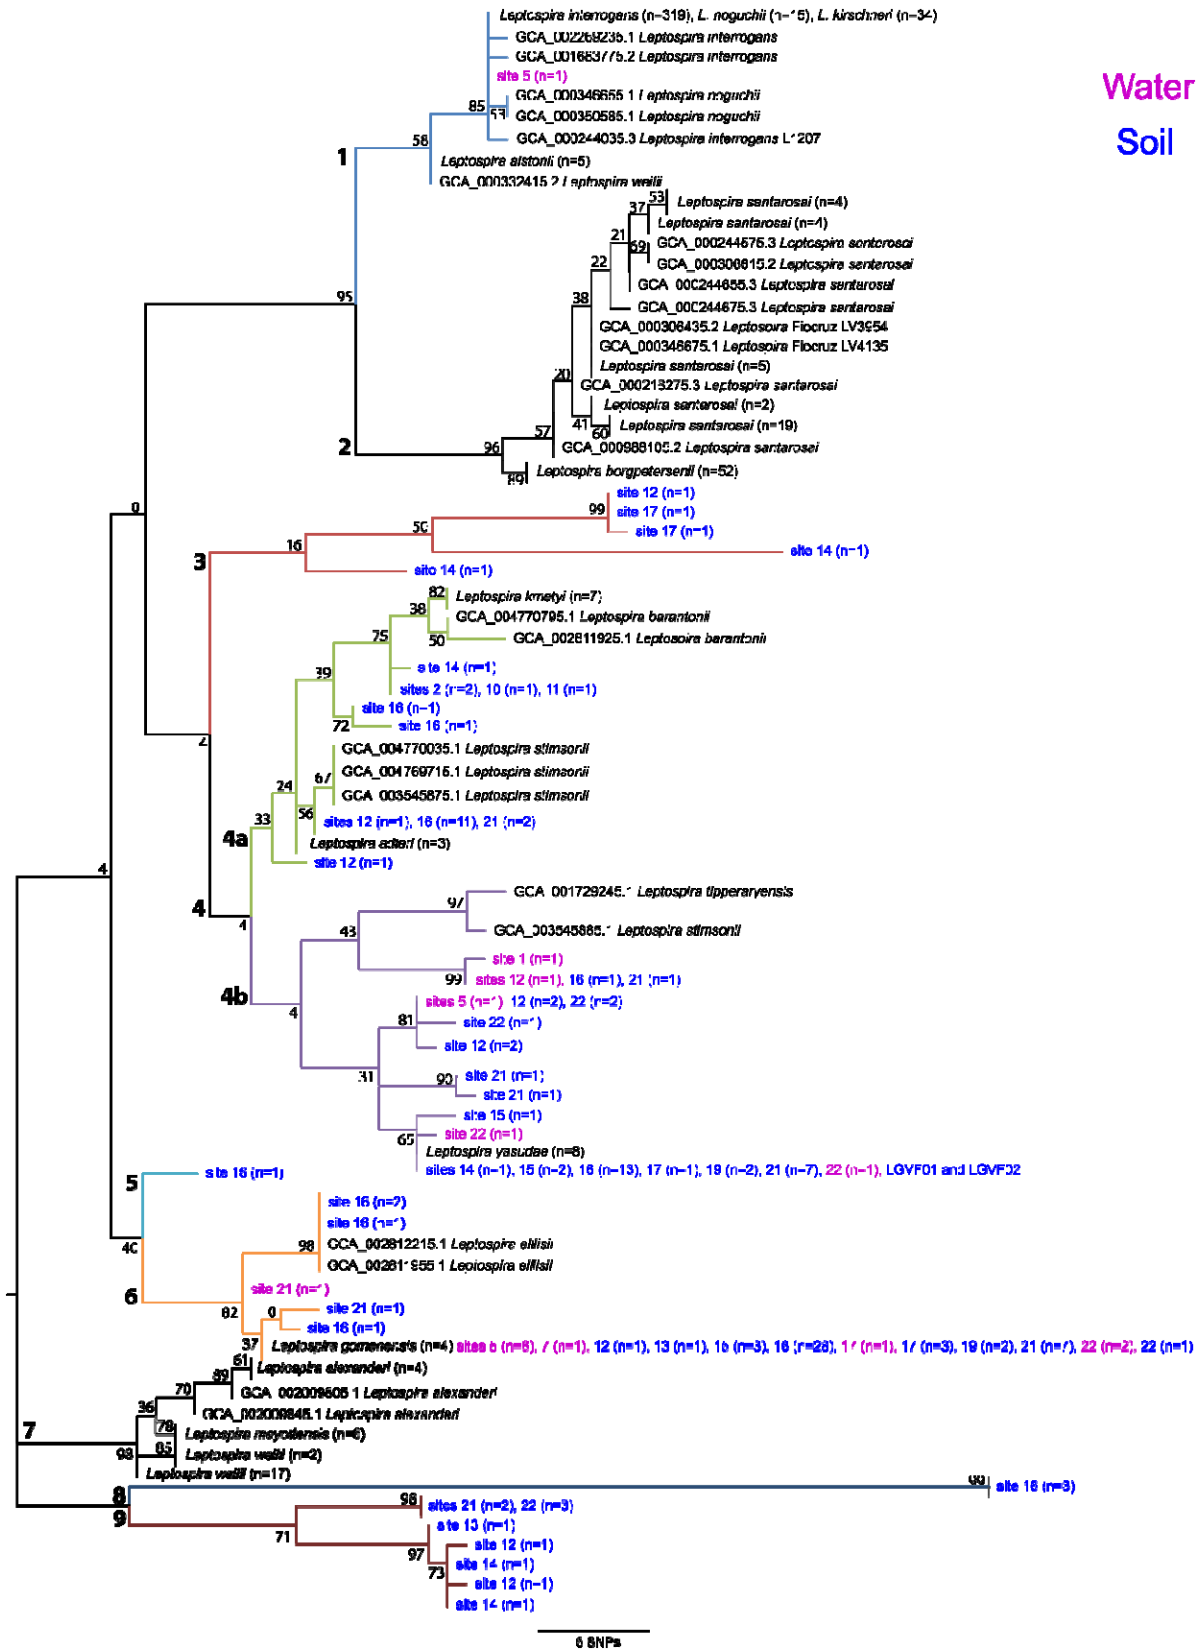

1043 **Figure S4: Maximum likelihood phylogeny built using a 202bp region of the *lipL32* gene.**  
1044 Sequences generated from soil (blue text) and water (pink text) samples collected in Puerto  
1045 Rico are displayed. Reference sequences representing all other known pathogenic *Leptospira*  
1046 spp. are in black. Nine major clades are represented of which seven were identified in Puerto  
1047 Rico and four of those (3, 5, 8, and 9) have not been described previously. Identical genotypes  
1048 were present in soil and water from Puerto Rico at two sites (17 and 21), with both occurrences  
1049 representing a single genotype from clade 6 (in orange). Bootstrap values are indicated on each  
1050 branch. Major clades are numbered 1 through 9 and color-coding matches Figure 2.  
1051

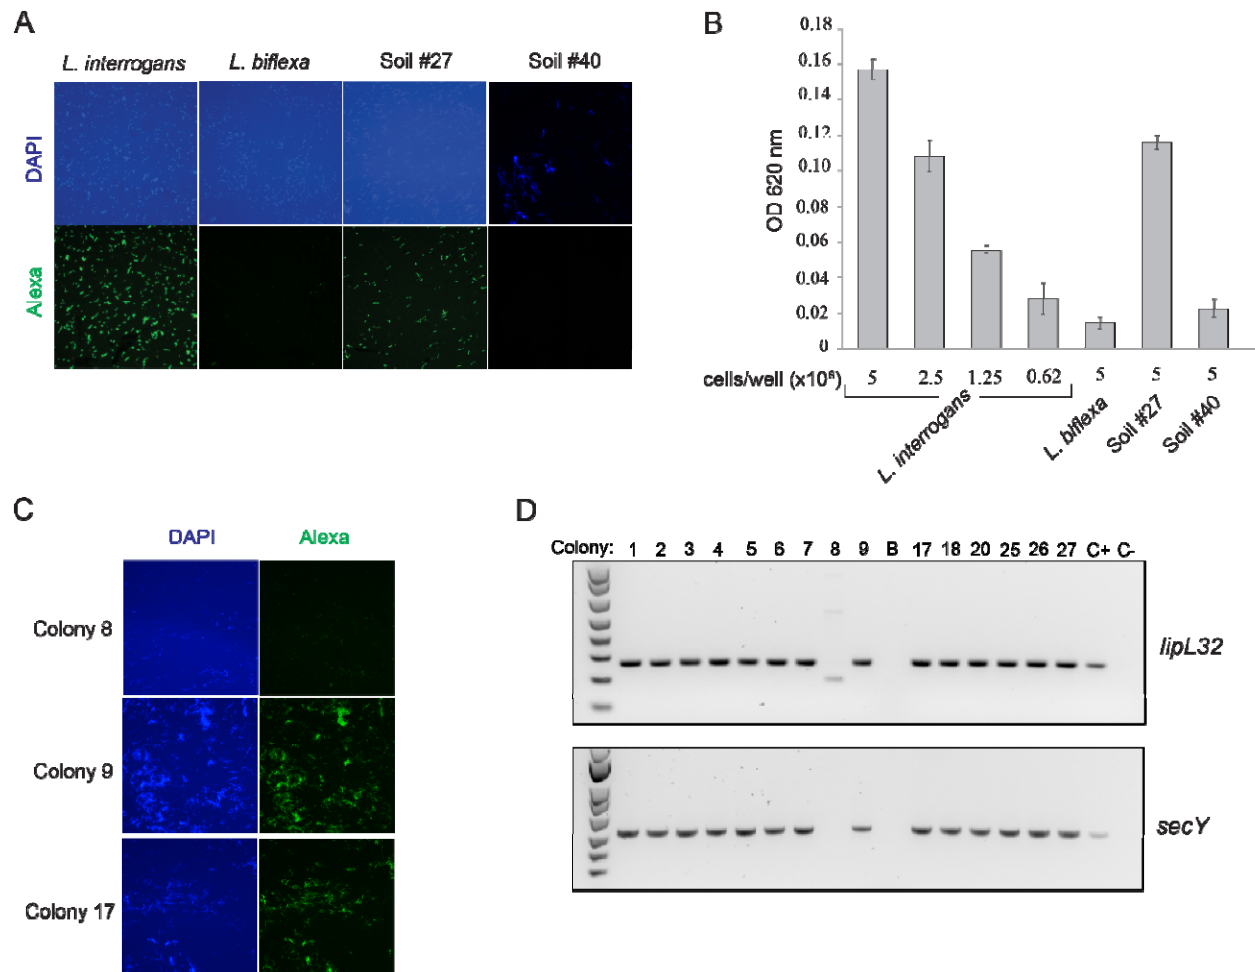

1052

1053 **Figure S5: Identification and isolation of pathogenic *Leptospira* spp. from Puerto Rico soil at**

1054 **serially sampled site 16. *LipL32* PCR positive (Soil #27) and negative (Soil #40) samples were**

1055 **subjected to FAT (Panel A) and ELISA (Panel B) along with positive and negative controls (*L.***

1056 ***interrogans* and *L. biflexa*, respectively) to assess expression of the LipL32 pathogenicity**

1057 **protein. Individual colonies from Soil #27 were subjected to additional FAT testing (Panel C) and**

1058 **confirmatory PCR (Panel D) to verify that the obtained isolates were pathogenic.**

1059



1060 **Supplemental File 1: Table S1 Results summary.** Summary of detection and sequencing results  
1061 for environmental samples from Puerto Rico, 2018-2020.

1062 **Supplemental File 1: Table S2 Sampling data.** Sample and site ID, location, elevation, and pH.

1063 **Supplemental File 1: Table S3 Accession numbers.** GenBank accession numbers for all  
1064 sequences used to build the *lipL32*, *secY*, and whole genome phylogenies.

1065 **Supplemental File 1: Table S4 Statistical tests.** Statistical tests used to assess associations  
1066 between the detection of pathogenic *Leptospira* spp. and environmental or sampling variables.

1067 **Supplemental File 1: Table S5 MAT panel.** Antigens used in the microscopic agglutination test  
1068 (MAT) that were unreactive when tested against sera from hamsters infected with the novel  
1069 pathogenic *Leptospira* spp. isolated from Puerto Rico soil.

1070 **Supplemental File 1: Table S6 *lipL32* sequences.** All *lipL32* sequences generated during this  
1071 study using Sanger and AmpSeq methods.

1072 **Supplemental File 1: Table S7: *secY* sequences.** All *secY* sequences generated during this study  
1073 for two *secY* amplicons (203 and 549bp).

1074 **Supplemental File 1: Table S8: 16S sequences.** Near full length 16S sequences (1330bp)  
1075 generated for six saprophytic isolates.

1076 **Supplemental File 1: Table S9: Genome assemblies.** Genome assembly details including  
1077 assembly size, number of contigs, and NCBI assembly accession numbers.

1078 **Supplemental File 1: Table S10: Hamster infection.** The weight of each hamster was recorded  
1079 daily, beginning two days preinfection.
